# Supplementary material for: TM4SF4 and LRRK2 Are Potential Therapeutic Targets in Lung and Breast Cancers through Outlier Analysis
Source: PubMed Central journal article supplement — Cancer Res Treat. 2020 Sep 16;53(1):9–24. doi: 10.4143/crt.2020.434 (PMC7812009; doi:10.4143/crt.2020.434), 2020-09-16
Supplement: crt-2020-434_S1Fig.pdf [file crt-2020-434_S1Fig.pdf]

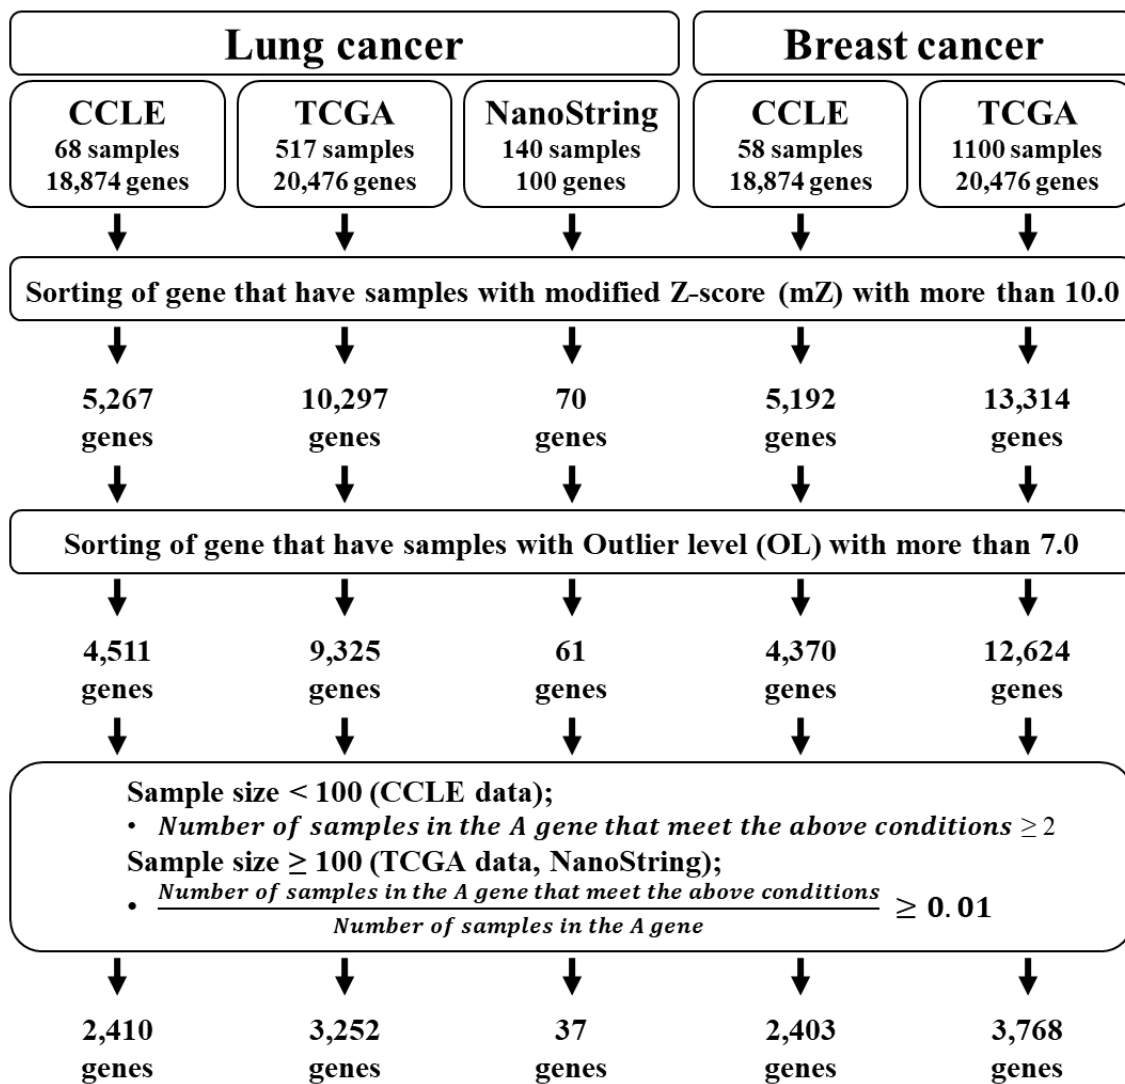

**S1 Fig.** The scheme of a modified Tukey's Fences method. CCLE, Cancer Cell Line Encyclopedia; TCGA, The Cancer Genome Atlas.
