# Supplementary material for: TM4SF4 and LRRK2 Are Potential Therapeutic Targets in Lung and Breast Cancers through Outlier Analysis
Source: PubMed Central journal article supplement — Cancer Res Treat. 2020 Sep 16;53(1):9–24. doi: 10.4143/crt.2020.434 (PMC7812009; doi:10.4143/crt.2020.434), 2020-09-16
Supplement: crt-2020-434_S2Table.pdf [file crt-2020-434_S2Table.pdf]

**S2 Table.** Customized nCounter gene expression panel list

| Gene            | lung cancer outlier gene sorted from both CCLE and TCGA |
|-----------------|---------------------------------------------------------|
| <i>EPHA7</i>    | 1. Kinase, Predicted membrane proteins                  |
| <i>BRDT</i>     | 2. Kinase                                               |
| <i>TM4SF4</i>   | 3. Predicted membrane proteins                          |
| <i>MUC13</i>    | 3. Predicted membrane proteins                          |
| <i>RNF186</i>   | 3. Predicted membrane proteins                          |
| <i>KCNH2</i>    | 3. Predicted membrane proteins                          |
| <i>CDH12</i>    | 3. Predicted membrane proteins                          |
| <i>FFAR2</i>    | 3. Predicted membrane proteins                          |
| <i>SCN3A</i>    | 3. Predicted membrane proteins                          |
| <i>B3GALT2</i>  | 3. Predicted membrane proteins                          |
| <i>CDH4</i>     | 3. Predicted membrane proteins                          |
| <i>CDH6</i>     | 3. Predicted membrane proteins                          |
| <i>KCNJ6</i>    | 3. Predicted membrane proteins                          |
| <i>USH1C</i>    | 4. Others                                               |
| <i>SOX11</i>    | 4. Others                                               |
| <i>VIL1</i>     | 4. Others                                               |
| <i>FGA</i>      | 4. Others                                               |
| <i>PAEP</i>     | 4. Others                                               |
| <i>APOBEC1</i>  | 4. Others                                               |
| <i>FGB</i>      | 4. Others                                               |
| <i>FGL1</i>     | 4. Others                                               |
| <i>SERPINA5</i> | 4. Others                                               |
| <i>TRIM15</i>   | 4. Others                                               |
| <i>TRIM31</i>   | 4. Others                                               |
| <i>AGT</i>      | 4. Others                                               |
| <i>CGA</i>      | 4. Others                                               |
| <i>RUNDC3A</i>  | 4. Others                                               |
| <i>AZGP1</i>    | 4. Others                                               |
| <i>CALCA</i>    | 4. Others                                               |
| <i>DDC</i>      | 4. Others                                               |
| <i>IGFBP1</i>   | 4. Others                                               |
| <i>KIF5C</i>    | 4. Others                                               |
| <i>NEFH</i>     | 4. Others                                               |
| <i>PAH</i>      | 4. Others                                               |
| <i>PROX1</i>    | 4. Others                                               |
| <i>ZMAT4</i>    | 4. Others                                               |
| <i>AMBP</i>     | 4. Others                                               |
| <i>ELAVL4</i>   | 4. Others                                               |
| <i>GAS2</i>     | 4. Others                                               |
| <i>HAL</i>      | 4. Others                                               |
| <i>HGD</i>      | 4. Others                                               |
| <i>KISS1</i>    | 4. Others                                               |
| <i>PCSK1</i>    | 4. Others                                               |
| <i>PIWIL1</i>   | 4. Others                                               |
| <i>POU3F2</i>   | 4. Others                                               |
| <i>AMPH</i>     | 4. Others                                               |
| <i>CA10</i>     | 4. Others                                               |

*FGF20*  
*HGF*  
*NOS3*  
*DLK1*  
*LBP*  
*ABP1*  
*NOL4*  
*PPP1R14D*  
*ASCL1*  
*CDH18*  
*FGF3*  
*GABRA5*  
*PCK1*  
*ALPP*  
*CA5A*  
*GRIA2*  
*INSM1*  
*LRRC31*  
*P63*  
*PCDH8*  
*RALYL*  
*SLITRK3*  
*ST18*  
*TAC1*  
*ACTB*  
*ALDH8A1*  
*ALPK3*  
*ARSE*  
*BHMT2*  
*CTBP1*  
*CTNNA2*  
*CUL1*  
*FAM5B*  
*FAM5C*  
*GAPDH*  
*GBA3*  
*GRM8*  
*GUSB*  
*HMBS*  
*IL1RL1*  
*LCE2B*  
*MKI67*  
*NRXN1*  
*ODAM*  
*PAGE1*  
*PAGE4*  
*SCG3*  
*SERPIND1*  
*SLC14A1*  
*SLC5A7*

4. Others  
4. Others  
4. Others

*TBP*  
*TTF-1*  
*UBQLN1*

---
