# Supplementary material for: TM4SF4 and LRRK2 Are Potential Therapeutic Targets in Lung and Breast Cancers through Outlier Analysis
Source: PubMed Central journal article supplement — Cancer Res Treat. 2020 Sep 16;53(1):9–24. doi: 10.4143/crt.2020.434 (PMC7812009; doi:10.4143/crt.2020.434), 2020-09-16
Supplement: crt-2020-434_S4Fig.pdf [file crt-2020-434_S4Fig.pdf]

A

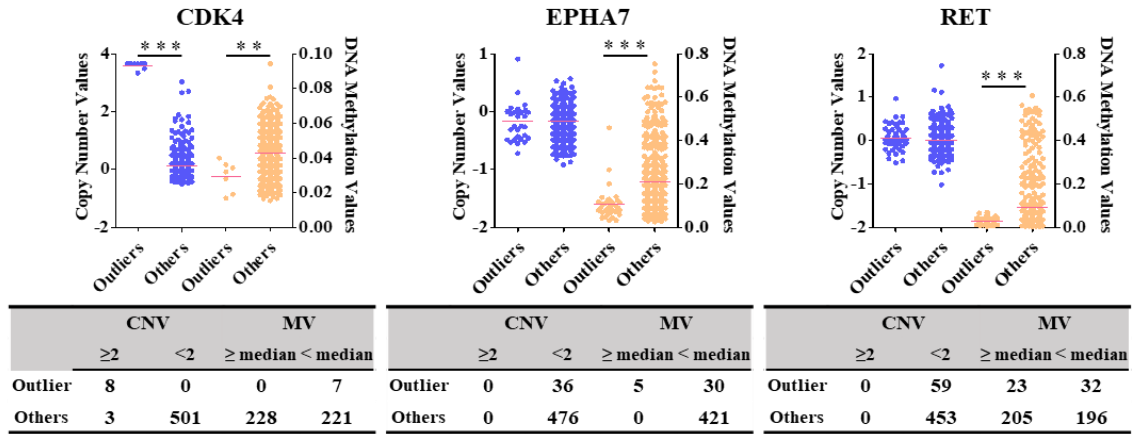

B

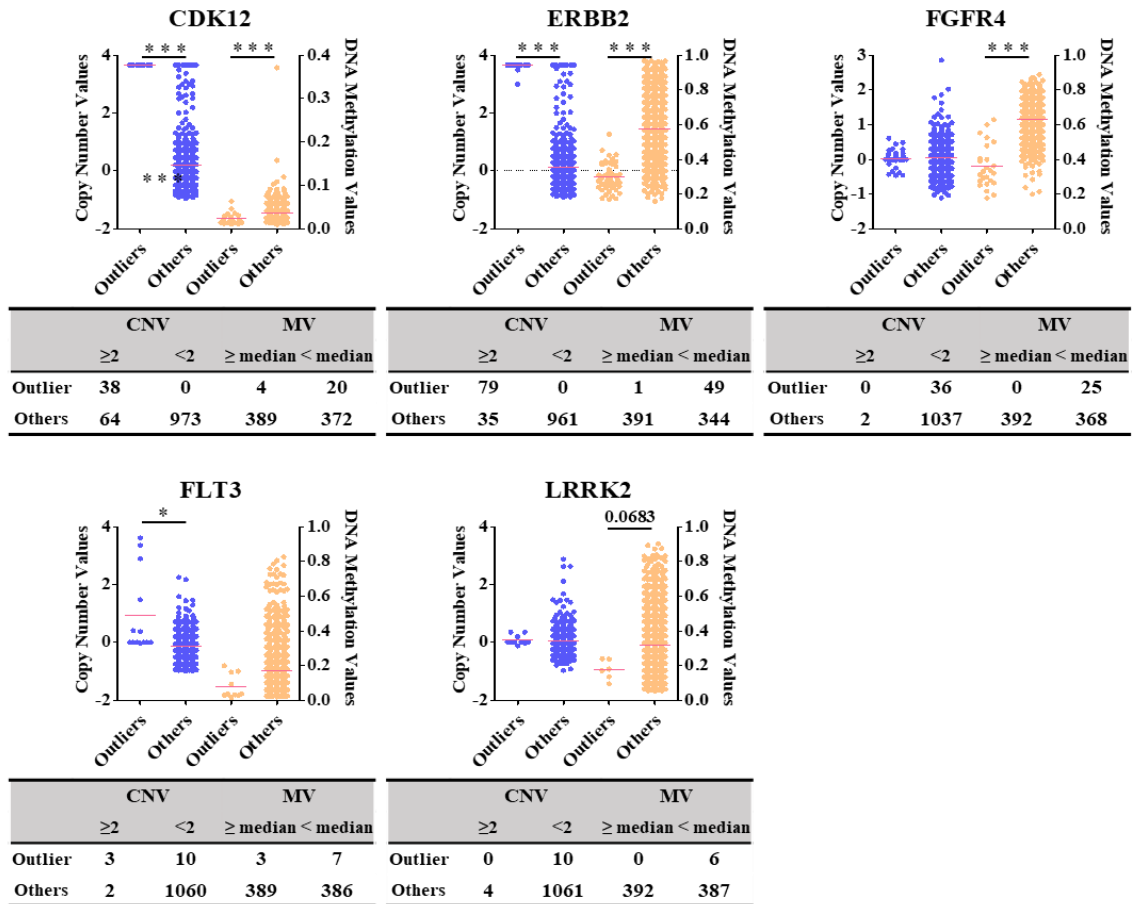

**S4 Fig.** Scatter plots of outlier kinase group-related DNA copy number (blue) and DNA methylation status (orange) in lung cancer (A) and breast cancer (B). Table shows the number of samples. These datasets are downloaded from TCGA. (\* $p \leq 0.05$ , \*\* $p \leq 0.01$ , \*\*\* $p \leq 0.001$ ).
