# Supplementary material for: TM4SF4 and LRRK2 Are Potential Therapeutic Targets in Lung and Breast Cancers through Outlier Analysis
Source: PubMed Central journal article supplement — Cancer Res Treat. 2020 Sep 16;53(1):9–24. doi: 10.4143/crt.2020.434 (PMC7812009; doi:10.4143/crt.2020.434), 2020-09-16
Supplement: crt-2020-434_S6Table.pdf [file crt-2020-434_S6Table.pdf]

**S6 Table.** Outlier gene list identified by COPA

| Lung cancer      |                                        | Breast cancer |                                        |
|------------------|----------------------------------------|---------------|----------------------------------------|
| Gene             | Outlier types                          | Gene          | Outlier types                          |
| <i>EPHA5</i>     | 1. Kinase, Predicted membrane proteins | ERBB2         | 1. Kinase, Predicted membrane proteins |
| <i>EPHA8</i>     | 1. Kinase, Predicted membrane proteins | MGC42105      | 1. Kinase, Predicted membrane proteins |
| <i>GUCY2C</i>    | 1. Kinase, Predicted membrane proteins | ROS1          | 1. Kinase, Predicted membrane proteins |
| <i>BRDT</i>      | 2. Kinase                              | VRK2          | 1. Kinase, Predicted membrane proteins |
| <i>CAMKV</i>     | 2. Kinase                              | BRDT          | 2. Kinase                              |
| <i>CDK4</i>      | 2. Kinase                              | CAMKV         | 2. Kinase                              |
| <i>CDKL4</i>     | 2. Kinase                              | CDK12         | 2. Kinase                              |
| <i>GRK1</i>      | 2. Kinase                              | CDK4          | 2. Kinase                              |
| <i>MAPK9</i>     | 2. Kinase                              | MOS           | 2. Kinase                              |
| <i>MOS</i>       | 2. Kinase                              | PAK1          | 2. Kinase                              |
| <i>MYT1</i>      | 2. Kinase                              | PDK3          | 2. Kinase                              |
| <i>ABCC12</i>    | 3. Predicted membrane proteins         | PRKCG         | 2. Kinase                              |
| <i>ABCC2</i>     | 3. Predicted membrane proteins         | RIOK1         | 2. Kinase                              |
| <i>ABCG5</i>     | 3. Predicted membrane proteins         | RPS6KB1       | 2. Kinase                              |
| <i>ACCN1</i>     | 3. Predicted membrane proteins         | STK38L        | 2. Kinase                              |
| <i>ADAM7</i>     | 3. Predicted membrane proteins         | TLK2          | 2. Kinase                              |
| <i>ADCY10</i>    | 3. Predicted membrane proteins         | YSK4          | 2. Kinase                              |
| <i>AGL</i>       | 3. Predicted membrane proteins         | ABCA13        | 3. Predicted membrane proteins         |
| <i>ALG9</i>      | 3. Predicted membrane proteins         | ACCN1         | 3. Predicted membrane proteins         |
| <i>ASB5</i>      | 3. Predicted membrane proteins         | ADRA1D        | 3. Predicted membrane proteins         |
| <i>ASGR2</i>     | 3. Predicted membrane proteins         | AGPAT6        | 3. Predicted membrane proteins         |
| <i>BEST3</i>     | 3. Predicted membrane proteins         | ALG8          | 3. Predicted membrane proteins         |
| <i>BSND</i>      | 3. Predicted membrane proteins         | ANO7          | 3. Predicted membrane proteins         |
| <i>BTNL8</i>     | 3. Predicted membrane proteins         | ART4          | 3. Predicted membrane proteins         |
| <i>C14orf68</i>  | 3. Predicted membrane proteins         | ATP2B3        | 3. Predicted membrane proteins         |
| <i>C19orf28</i>  | 3. Predicted membrane proteins         | BSND          | 3. Predicted membrane proteins         |
| <i>C20orf123</i> | 3. Predicted membrane proteins         | BTNL8         | 3. Predicted membrane proteins         |

|                |                                |          |                                |
|----------------|--------------------------------|----------|--------------------------------|
| <i>CA14</i>    | 3. Predicted membrane proteins | C17orf71 | 3. Predicted membrane proteins |
| <i>CABP7</i>   | 3. Predicted membrane proteins | C2orf82  | 3. Predicted membrane proteins |
| <i>CACNA1A</i> | 3. Predicted membrane proteins | C2orf85  | 3. Predicted membrane proteins |
| <i>CACNA1B</i> | 3. Predicted membrane proteins | C5orf60  | 3. Predicted membrane proteins |
| <i>CALY</i>    | 3. Predicted membrane proteins | CABP7    | 3. Predicted membrane proteins |
| <i>CCKBR</i>   | 3. Predicted membrane proteins | CALHM1   | 3. Predicted membrane proteins |
| <i>CDH12</i>   | 3. Predicted membrane proteins | CALHM3   | 3. Predicted membrane proteins |
| <i>CDH16</i>   | 3. Predicted membrane proteins | CCDC155  | 3. Predicted membrane proteins |
| <i>CDHR2</i>   | 3. Predicted membrane proteins | CCKAR    | 3. Predicted membrane proteins |
| <i>CDHR5</i>   | 3. Predicted membrane proteins | CCKBR    | 3. Predicted membrane proteins |
| <i>CHRNA9</i>  | 3. Predicted membrane proteins | CDH4     | 3. Predicted membrane proteins |
| <i>CHRNB2</i>  | 3. Predicted membrane proteins | CDH7     | 3. Predicted membrane proteins |
| <i>CLCA4</i>   | 3. Predicted membrane proteins | CDHR4    | 3. Predicted membrane proteins |
| <i>CLDN17</i>  | 3. Predicted membrane proteins | CDHR5    | 3. Predicted membrane proteins |
| <i>CLDN22</i>  | 3. Predicted membrane proteins | CDKAL1   | 3. Predicted membrane proteins |
| <i>CLEC2L</i>  | 3. Predicted membrane proteins | CHRNA9   | 3. Predicted membrane proteins |
| <i>CLRN3</i>   | 3. Predicted membrane proteins | CLDN10   | 3. Predicted membrane proteins |
| <i>CNGB3</i>   | 3. Predicted membrane proteins | CLDN22   | 3. Predicted membrane proteins |
| <i>COL25A1</i> | 3. Predicted membrane proteins | CLEC2L   | 3. Predicted membrane proteins |
| <i>COX7A2L</i> | 3. Predicted membrane proteins | CLEC6A   | 3. Predicted membrane proteins |
| <i>CREB3L3</i> | 3. Predicted membrane proteins | CNTN6    | 3. Predicted membrane proteins |
| <i>CRHR1</i>   | 3. Predicted membrane proteins | COX11    | 3. Predicted membrane proteins |
| <i>CRHR2</i>   | 3. Predicted membrane proteins | CXorf59  | 3. Predicted membrane proteins |
| <i>CSMD3</i>   | 3. Predicted membrane proteins | CYP4A22  | 3. Predicted membrane proteins |
| <i>CTCFL</i>   | 3. Predicted membrane proteins | ERGIC3   | 3. Predicted membrane proteins |
| <i>CUZD1</i>   | 3. Predicted membrane proteins | FATE1    | 3. Predicted membrane proteins |
| <i>CYP3A4</i>  | 3. Predicted membrane proteins | FBXO18   | 3. Predicted membrane proteins |

|                |                                |                |                                |
|----------------|--------------------------------|----------------|--------------------------------|
| <i>CYP4F8</i>  | 3. Predicted membrane proteins | <i>FER1L6</i>  | 3. Predicted membrane proteins |
| <i>DSC1</i>    | 3. Predicted membrane proteins | <i>FUT5</i>    | 3. Predicted membrane proteins |
| <i>DSG3</i>    | 3. Predicted membrane proteins | <i>GABBR2</i>  | 3. Predicted membrane proteins |
| <i>FADS6</i>   | 3. Predicted membrane proteins | <i>GABRA5</i>  | 3. Predicted membrane proteins |
| <i>FAM163A</i> | 3. Predicted membrane proteins | <i>GABRQ</i>   | 3. Predicted membrane proteins |
| <i>FAM75A6</i> | 3. Predicted membrane proteins | <i>GALNT9</i>  | 3. Predicted membrane proteins |
| <i>FER1L6</i>  | 3. Predicted membrane proteins | <i>GCNT3</i>   | 3. Predicted membrane proteins |
| <i>FURIN</i>   | 3. Predicted membrane proteins | <i>GDAP1L1</i> | 3. Predicted membrane proteins |
| <i>FXYD2</i>   | 3. Predicted membrane proteins | <i>GDPD2</i>   | 3. Predicted membrane proteins |
| <i>GABRA3</i>  | 3. Predicted membrane proteins | <i>GDPD4</i>   | 3. Predicted membrane proteins |
| <i>GABRR1</i>  | 3. Predicted membrane proteins | <i>GFRA3</i>   | 3. Predicted membrane proteins |
| <i>GABRR3</i>  | 3. Predicted membrane proteins | <i>GJB6</i>    | 3. Predicted membrane proteins |
| <i>GALNT8</i>  | 3. Predicted membrane proteins | <i>GPR142</i>  | 3. Predicted membrane proteins |
| <i>GALNTL5</i> | 3. Predicted membrane proteins | <i>GPR150</i>  | 3. Predicted membrane proteins |
| <i>GALR2</i>   | 3. Predicted membrane proteins | <i>GPR22</i>   | 3. Predicted membrane proteins |
| <i>GCCR</i>    | 3. Predicted membrane proteins | <i>GPR25</i>   | 3. Predicted membrane proteins |
| <i>GDPD2</i>   | 3. Predicted membrane proteins | <i>GPR26</i>   | 3. Predicted membrane proteins |
| <i>GJA10</i>   | 3. Predicted membrane proteins | <i>GPR88</i>   | 3. Predicted membrane proteins |
| <i>GJA3</i>    | 3. Predicted membrane proteins | <i>GRIA1</i>   | 3. Predicted membrane proteins |
| <i>GPR12</i>   | 3. Predicted membrane proteins | <i>GRIN2C</i>  | 3. Predicted membrane proteins |
| <i>GPR139</i>  | 3. Predicted membrane proteins | <i>GRIN3B</i>  | 3. Predicted membrane proteins |
| <i>GPR144</i>  | 3. Predicted membrane proteins | <i>GSG1L</i>   | 3. Predicted membrane proteins |
| <i>GPR78</i>   | 3. Predicted membrane proteins | <i>HAVCR1</i>  | 3. Predicted membrane proteins |
| <i>GRIA4</i>   | 3. Predicted membrane proteins | <i>HEPHL1</i>  | 3. Predicted membrane proteins |
| <i>GRIK1</i>   | 3. Predicted membrane proteins | <i>HRH3</i>    | 3. Predicted membrane proteins |
| <i>GRIK5</i>   | 3. Predicted membrane proteins | <i>HRK</i>     | 3. Predicted membrane proteins |
| <i>GRIN2C</i>  | 3. Predicted membrane proteins | <i>HTR3A</i>   | 3. Predicted membrane proteins |

|                 |                                |                     |                                |
|-----------------|--------------------------------|---------------------|--------------------------------|
| <i>GRPR</i>     | 3. Predicted membrane proteins | <i>HTR6</i>         | 3. Predicted membrane proteins |
| <i>HEPACAM2</i> | 3. Predicted membrane proteins | <i>IL19</i>         | 3. Predicted membrane proteins |
| <i>HEPHL1</i>   | 3. Predicted membrane proteins | <i>IL20RB</i>       | 3. Predicted membrane proteins |
| <i>HFE2</i>     | 3. Predicted membrane proteins | <i>KCNH6</i>        | 3. Predicted membrane proteins |
| <i>HHATL</i>    | 3. Predicted membrane proteins | <i>KCNH7</i>        | 3. Predicted membrane proteins |
| <i>HOXC11</i>   | 3. Predicted membrane proteins | <i>KCNJ1</i>        | 3. Predicted membrane proteins |
| <i>IGDCC3</i>   | 3. Predicted membrane proteins | <i>KCNJ6</i>        | 3. Predicted membrane proteins |
| <i>IMP5</i>     | 3. Predicted membrane proteins | <i>KCNJ9</i>        | 3. Predicted membrane proteins |
| <i>IQCF5</i>    | 3. Predicted membrane proteins | <i>KCNK10</i>       | 3. Predicted membrane proteins |
| <i>KCNB2</i>    | 3. Predicted membrane proteins | <i>KCNK9</i>        | 3. Predicted membrane proteins |
| <i>KCNC1</i>    | 3. Predicted membrane proteins | <i>KIAA1409</i>     | 3. Predicted membrane proteins |
| <i>KCNH6</i>    | 3. Predicted membrane proteins | <i>KIR2DL1</i>      | 3. Predicted membrane proteins |
| <i>KCNH7</i>    | 3. Predicted membrane proteins | <i>KIRREL2</i>      | 3. Predicted membrane proteins |
| <i>KCNK10</i>   | 3. Predicted membrane proteins | <i>KIRREL3</i>      | 3. Predicted membrane proteins |
| <i>KCNK18</i>   | 3. Predicted membrane proteins | <i>LASS3</i>        | 3. Predicted membrane proteins |
| <i>KCNK9</i>    | 3. Predicted membrane proteins | <i>LCT</i>          | 3. Predicted membrane proteins |
| <i>KCNN1</i>    | 3. Predicted membrane proteins | <i>LCTL</i>         | 3. Predicted membrane proteins |
| <i>KCNQ2</i>    | 3. Predicted membrane proteins | <i>LEMD1</i>        | 3. Predicted membrane proteins |
| <i>KCNT1</i>    | 3. Predicted membrane proteins | <i>LHFPL4</i>       | 3. Predicted membrane proteins |
| <i>KCNV1</i>    | 3. Predicted membrane proteins | <i>LMAN1L</i>       | 3. Predicted membrane proteins |
| <i>KIAA1409</i> | 3. Predicted membrane proteins | <i>LOC100130933</i> | 3. Predicted membrane proteins |
| <i>KIR2DL1</i>  | 3. Predicted membrane proteins | <i>LRRN4</i>        | 3. Predicted membrane proteins |
| <i>KIRREL3</i>  | 3. Predicted membrane proteins | <i>LYPD5</i>        | 3. Predicted membrane proteins |
| <i>LASS3</i>    | 3. Predicted membrane proteins | <i>MADCAM1</i>      | 3. Predicted membrane proteins |
| <i>LEMD3</i>    | 3. Predicted membrane proteins | <i>MC4R</i>         | 3. Predicted membrane proteins |
| <i>LHCGR</i>    | 3. Predicted membrane proteins | <i>MED24</i>        | 3. Predicted membrane proteins |
| <i>LINGO2</i>   | 3. Predicted membrane proteins | <i>MEGF11</i>       | 3. Predicted membrane proteins |

|                  |                                |          |                                |
|------------------|--------------------------------|----------|--------------------------------|
| <i>LOC153328</i> | 3. Predicted membrane proteins | MLC1     | 3. Predicted membrane proteins |
| <i>LOC388946</i> | 3. Predicted membrane proteins | MS4A5    | 3. Predicted membrane proteins |
| <i>LPCAT4</i>    | 3. Predicted membrane proteins | MSLN     | 3. Predicted membrane proteins |
| <i>LRRC66</i>    | 3. Predicted membrane proteins | MSLNL    | 3. Predicted membrane proteins |
| <i>LYZL2</i>     | 3. Predicted membrane proteins | MUC13    | 3. Predicted membrane proteins |
| <i>MC5R</i>      | 3. Predicted membrane proteins | MUC4     | 3. Predicted membrane proteins |
| <i>MDM1</i>      | 3. Predicted membrane proteins | NCR1     | 3. Predicted membrane proteins |
| <i>MFF</i>       | 3. Predicted membrane proteins | NDUFA4L2 | 3. Predicted membrane proteins |
| <i>MRGPRE</i>    | 3. Predicted membrane proteins | NDUFC2   | 3. Predicted membrane proteins |
| <i>MRGPRX1</i>   | 3. Predicted membrane proteins | NMBR     | 3. Predicted membrane proteins |
| <i>MS4A13</i>    | 3. Predicted membrane proteins | NMUR2    | 3. Predicted membrane proteins |
| <i>MS4A5</i>     | 3. Predicted membrane proteins | NPHS1    | 3. Predicted membrane proteins |
| <i>NKAIN2</i>    | 3. Predicted membrane proteins | NTSR1    | 3. Predicted membrane proteins |
| <i>NNAT</i>      | 3. Predicted membrane proteins | NUP107   | 3. Predicted membrane proteins |
| <i>NPBWR1</i>    | 3. Predicted membrane proteins | NUP210L  | 3. Predicted membrane proteins |
| <i>NPBWR2</i>    | 3. Predicted membrane proteins | OCA2     | 3. Predicted membrane proteins |
| <i>NPFFR2</i>    | 3. Predicted membrane proteins | OPRK1    | 3. Predicted membrane proteins |
| <i>NPSR1</i>     | 3. Predicted membrane proteins | OR10AG1  | 3. Predicted membrane proteins |
| <i>NPY5R</i>     | 3. Predicted membrane proteins | OR10C1   | 3. Predicted membrane proteins |
| <i>NRXN1</i>     | 3. Predicted membrane proteins | OR10J1   | 3. Predicted membrane proteins |
| <i>NTSR1</i>     | 3. Predicted membrane proteins | OR10T2   | 3. Predicted membrane proteins |
| <i>OR10A4</i>    | 3. Predicted membrane proteins | OR10X1   | 3. Predicted membrane proteins |
| <i>OR10A5</i>    | 3. Predicted membrane proteins | OR11H1   | 3. Predicted membrane proteins |
| <i>OR10G3</i>    | 3. Predicted membrane proteins | OR13C4   | 3. Predicted membrane proteins |
| <i>OR10G4</i>    | 3. Predicted membrane proteins | OR14J1   | 3. Predicted membrane proteins |
| <i>OR10G7</i>    | 3. Predicted membrane proteins | OR1A2    | 3. Predicted membrane proteins |
| <i>OR10G8</i>    | 3. Predicted membrane proteins | OR1J2    | 3. Predicted membrane proteins |

|                |                                |        |                                |
|----------------|--------------------------------|--------|--------------------------------|
| <i>OR10J1</i>  | 3. Predicted membrane proteins | OR2G6  | 3. Predicted membrane proteins |
| <i>OR10J5</i>  | 3. Predicted membrane proteins | OR2M2  | 3. Predicted membrane proteins |
| <i>OR10S1</i>  | 3. Predicted membrane proteins | OR2M5  | 3. Predicted membrane proteins |
| <i>OR10W1</i>  | 3. Predicted membrane proteins | OR2T1  | 3. Predicted membrane proteins |
| <i>OR13F1</i>  | 3. Predicted membrane proteins | OR2T34 | 3. Predicted membrane proteins |
| <i>OR13H1</i>  | 3. Predicted membrane proteins | OR3A2  | 3. Predicted membrane proteins |
| <i>OR14A16</i> | 3. Predicted membrane proteins | OR4B1  | 3. Predicted membrane proteins |
| <i>OR14C36</i> | 3. Predicted membrane proteins | OR4C11 | 3. Predicted membrane proteins |
| <i>OR1A2</i>   | 3. Predicted membrane proteins | OR4C12 | 3. Predicted membrane proteins |
| <i>OR1D2</i>   | 3. Predicted membrane proteins | OR4K5  | 3. Predicted membrane proteins |
| <i>OR1G1</i>   | 3. Predicted membrane proteins | OR4S1  | 3. Predicted membrane proteins |
| <i>OR2AK2</i>  | 3. Predicted membrane proteins | OR4S2  | 3. Predicted membrane proteins |
| <i>OR2B2</i>   | 3. Predicted membrane proteins | OR4X1  | 3. Predicted membrane proteins |
| <i>OR2B3</i>   | 3. Predicted membrane proteins | OR51A4 | 3. Predicted membrane proteins |
| <i>OR2G6</i>   | 3. Predicted membrane proteins | OR51A7 | 3. Predicted membrane proteins |
| <i>OR2H1</i>   | 3. Predicted membrane proteins | OR51D1 | 3. Predicted membrane proteins |
| <i>OR2J2</i>   | 3. Predicted membrane proteins | OR51G1 | 3. Predicted membrane proteins |
| <i>OR2M3</i>   | 3. Predicted membrane proteins | OR51G2 | 3. Predicted membrane proteins |
| <i>OR2M4</i>   | 3. Predicted membrane proteins | OR51L1 | 3. Predicted membrane proteins |
| <i>OR2T2</i>   | 3. Predicted membrane proteins | OR52A1 | 3. Predicted membrane proteins |
| <i>OR2T5</i>   | 3. Predicted membrane proteins | OR56A1 | 3. Predicted membrane proteins |
| <i>OR2T6</i>   | 3. Predicted membrane proteins | OR5AR1 | 3. Predicted membrane proteins |
| <i>OR2V2</i>   | 3. Predicted membrane proteins | OR5M10 | 3. Predicted membrane proteins |
| <i>OR2W1</i>   | 3. Predicted membrane proteins | OR5T2  | 3. Predicted membrane proteins |
| <i>OR2Z1</i>   | 3. Predicted membrane proteins | OR5T3  | 3. Predicted membrane proteins |
| <i>OR3A3</i>   | 3. Predicted membrane proteins | OR5V1  | 3. Predicted membrane proteins |
| <i>OR4A16</i>  | 3. Predicted membrane proteins | OR6C3  | 3. Predicted membrane proteins |

|               |                                |        |                                |
|---------------|--------------------------------|--------|--------------------------------|
| <i>OR4C3</i>  | 3. Predicted membrane proteins | OR6C6  | 3. Predicted membrane proteins |
| <i>OR4C6</i>  | 3. Predicted membrane proteins | OR6K2  | 3. Predicted membrane proteins |
| <i>OR4D10</i> | 3. Predicted membrane proteins | OR6K6  | 3. Predicted membrane proteins |
| <i>OR4D2</i>  | 3. Predicted membrane proteins | OR6M1  | 3. Predicted membrane proteins |
| <i>OR4D5</i>  | 3. Predicted membrane proteins | OR7C1  | 3. Predicted membrane proteins |
| <i>OR4K17</i> | 3. Predicted membrane proteins | OR7G2  | 3. Predicted membrane proteins |
| <i>OR4M2</i>  | 3. Predicted membrane proteins | OR8B12 | 3. Predicted membrane proteins |
| <i>OR4X2</i>  | 3. Predicted membrane proteins | OR8B3  | 3. Predicted membrane proteins |
| <i>OR51E2</i> | 3. Predicted membrane proteins | OR8B4  | 3. Predicted membrane proteins |
| <i>OR51F2</i> | 3. Predicted membrane proteins | OR8B8  | 3. Predicted membrane proteins |
| <i>OR51T1</i> | 3. Predicted membrane proteins | OR8D2  | 3. Predicted membrane proteins |
| <i>OR52A1</i> | 3. Predicted membrane proteins | OR8H1  | 3. Predicted membrane proteins |
| <i>OR52A5</i> | 3. Predicted membrane proteins | OR8J1  | 3. Predicted membrane proteins |
| <i>OR52E2</i> | 3. Predicted membrane proteins | OR8K3  | 3. Predicted membrane proteins |
| <i>OR52E4</i> | 3. Predicted membrane proteins | OR8K5  | 3. Predicted membrane proteins |
| <i>OR52E6</i> | 3. Predicted membrane proteins | OR8U1  | 3. Predicted membrane proteins |
| <i>OR52E8</i> | 3. Predicted membrane proteins | OR9Q2  | 3. Predicted membrane proteins |
| <i>OR52N2</i> | 3. Predicted membrane proteins | ORMDL3 | 3. Predicted membrane proteins |
| <i>OR52R1</i> | 3. Predicted membrane proteins | P2RX2  | 3. Predicted membrane proteins |
| <i>OR56A1</i> | 3. Predicted membrane proteins | P2RY4  | 3. Predicted membrane proteins |
| <i>OR56A4</i> | 3. Predicted membrane proteins | PCDH10 | 3. Predicted membrane proteins |
| <i>OR56A5</i> | 3. Predicted membrane proteins | PGAP3  | 3. Predicted membrane proteins |
| <i>OR56B4</i> | 3. Predicted membrane proteins | PLD5   | 3. Predicted membrane proteins |
| <i>OR5A1</i>  | 3. Predicted membrane proteins | PNLDC1 | 3. Predicted membrane proteins |
| <i>OR5A2</i>  | 3. Predicted membrane proteins | PPFIA1 | 3. Predicted membrane proteins |
| <i>OR5AC2</i> | 3. Predicted membrane proteins | PRKRIR | 3. Predicted membrane proteins |
| <i>OR5ANI</i> | 3. Predicted membrane proteins | PTPN1  | 3. Predicted membrane proteins |

|                |                                |          |                                |
|----------------|--------------------------------|----------|--------------------------------|
| <i>OR5B3</i>   | 3. Predicted membrane proteins | PTRH2    | 3. Predicted membrane proteins |
| <i>OR5H1</i>   | 3. Predicted membrane proteins | RAET1L   | 3. Predicted membrane proteins |
| <i>OR5H2</i>   | 3. Predicted membrane proteins | RHO      | 3. Predicted membrane proteins |
| <i>OR5H6</i>   | 3. Predicted membrane proteins | RNF182   | 3. Predicted membrane proteins |
| <i>OR5M1</i>   | 3. Predicted membrane proteins | RNF222   | 3. Predicted membrane proteins |
| <i>OR5M11</i>  | 3. Predicted membrane proteins | RTBDN    | 3. Predicted membrane proteins |
| <i>OR5T2</i>   | 3. Predicted membrane proteins | RXFP4    | 3. Predicted membrane proteins |
| <i>OR5T3</i>   | 3. Predicted membrane proteins | SEMA4C   | 3. Predicted membrane proteins |
| <i>OR5V1</i>   | 3. Predicted membrane proteins | SLC10A4  | 3. Predicted membrane proteins |
| <i>OR6C3</i>   | 3. Predicted membrane proteins | SLC12A5  | 3. Predicted membrane proteins |
| <i>OR6C6</i>   | 3. Predicted membrane proteins | SLC13A4  | 3. Predicted membrane proteins |
| <i>OR6C75</i>  | 3. Predicted membrane proteins | SLC13A5  | 3. Predicted membrane proteins |
| <i>OR6M1</i>   | 3. Predicted membrane proteins | SLC1A6   | 3. Predicted membrane proteins |
| <i>OR6V1</i>   | 3. Predicted membrane proteins | SLC22A10 | 3. Predicted membrane proteins |
| <i>OR7D4</i>   | 3. Predicted membrane proteins | SLC22A16 | 3. Predicted membrane proteins |
| <i>OR7G2</i>   | 3. Predicted membrane proteins | SLC26A4  | 3. Predicted membrane proteins |
| <i>OR7G3</i>   | 3. Predicted membrane proteins | SLC30A3  | 3. Predicted membrane proteins |
| <i>OR8B12</i>  | 3. Predicted membrane proteins | SLC3A1   | 3. Predicted membrane proteins |
| <i>OR8B2</i>   | 3. Predicted membrane proteins | SLC4A10  | 3. Predicted membrane proteins |
| <i>OR8B3</i>   | 3. Predicted membrane proteins | SLC4A4   | 3. Predicted membrane proteins |
| <i>OR8B4</i>   | 3. Predicted membrane proteins | SLC5A12  | 3. Predicted membrane proteins |
| <i>OR8D2</i>   | 3. Predicted membrane proteins | SLC5A5   | 3. Predicted membrane proteins |
| <i>OR8K3</i>   | 3. Predicted membrane proteins | SLC5A8   | 3. Predicted membrane proteins |
| <i>OR9K2</i>   | 3. Predicted membrane proteins | SLC6A2   | 3. Predicted membrane proteins |
| <i>P2RY4</i>   | 3. Predicted membrane proteins | SLC6A3   | 3. Predicted membrane proteins |
| <i>PCDHGA8</i> | 3. Predicted membrane proteins | SLC6A5   | 3. Predicted membrane proteins |
| <i>PEX2</i>    | 3. Predicted membrane proteins | STARD3   | 3. Predicted membrane proteins |



|                 |                                |          |                                |
|-----------------|--------------------------------|----------|--------------------------------|
| <i>PLA2G2F</i>  | 3. Predicted membrane proteins | SYP      | 3. Predicted membrane proteins |
| <i>PNLDC1</i>   | 3. Predicted membrane proteins | SYT14    | 3. Predicted membrane proteins |
| <i>PRAP1</i>    | 3. Predicted membrane proteins | SYT5     | 3. Predicted membrane proteins |
| <i>PROKR1</i>   | 3. Predicted membrane proteins | TAAR6    | 3. Predicted membrane proteins |
| <i>PSG6</i>     | 3. Predicted membrane proteins | TAAR8    | 3. Predicted membrane proteins |
| <i>PSG9</i>     | 3. Predicted membrane proteins | TM2D2    | 3. Predicted membrane proteins |
| <i>PTH2R</i>    | 3. Predicted membrane proteins | TM4SF4   | 3. Predicted membrane proteins |
| <i>RHCG</i>     | 3. Predicted membrane proteins | TMC3     | 3. Predicted membrane proteins |
| <i>SCN3A</i>    | 3. Predicted membrane proteins | TMCC2    | 3. Predicted membrane proteins |
| <i>SDHD</i>     | 3. Predicted membrane proteins | TMEM132E | 3. Predicted membrane proteins |
| <i>SELT</i>     | 3. Predicted membrane proteins | TMEM151A | 3. Predicted membrane proteins |
| <i>SEZ6</i>     | 3. Predicted membrane proteins | TMEM190  | 3. Predicted membrane proteins |
| <i>SHISA9</i>   | 3. Predicted membrane proteins | TMEM207  | 3. Predicted membrane proteins |
| <i>SLC13A5</i>  | 3. Predicted membrane proteins | TMEM49   | 3. Predicted membrane proteins |
| <i>SLC14A2</i>  | 3. Predicted membrane proteins | TMPRSS7  | 3. Predicted membrane proteins |
| <i>SLC17A7</i>  | 3. Predicted membrane proteins | TPTE     | 3. Predicted membrane proteins |
| <i>SLC22A11</i> | 3. Predicted membrane proteins | TPTE2    | 3. Predicted membrane proteins |
| <i>SLC30A2</i>  | 3. Predicted membrane proteins | TRPA1    | 3. Predicted membrane proteins |
| <i>SLC30A8</i>  | 3. Predicted membrane proteins | TRPM5    | 3. Predicted membrane proteins |
| <i>SLC35D3</i>  | 3. Predicted membrane proteins | TRPM8    | 3. Predicted membrane proteins |
| <i>SLC35E3</i>  | 3. Predicted membrane proteins | TRPV5    | 3. Predicted membrane proteins |
| <i>SLC38A11</i> | 3. Predicted membrane proteins | TSPAN14  | 3. Predicted membrane proteins |
| <i>SLC39A2</i>  | 3. Predicted membrane proteins | UBA1     | 3. Predicted membrane proteins |
| <i>SLC39A5</i>  | 3. Predicted membrane proteins | UBA2     | 3. Predicted membrane proteins |
| <i>SLC3A1</i>   | 3. Predicted membrane proteins | UGT1A5   | 3. Predicted membrane proteins |
| <i>SLC5A7</i>   | 3. Predicted membrane proteins | UPK1A    | 3. Predicted membrane proteins |
| <i>SLC6A11</i>  | 3. Predicted membrane proteins | UPK2     | 3. Predicted membrane proteins |

|                  |                                |          |                                |
|------------------|--------------------------------|----------|--------------------------------|
| <i>SLC6A15</i>   | 3. Predicted membrane proteins | UTS2R    | 3. Predicted membrane proteins |
| <i>SLC7A3</i>    | 3. Predicted membrane proteins | VAPB     | 3. Predicted membrane proteins |
| <i>SLC7A9</i>    | 3. Predicted membrane proteins | ZACN     | 3. Predicted membrane proteins |
| <i>SLC9A3</i>    | 3. Predicted membrane proteins | ZDHHC19  | 3. Predicted membrane proteins |
| <i>SPACA1</i>    | 3. Predicted membrane proteins | ZDHHC22  | 3. Predicted membrane proteins |
| <i>SPATA3</i>    | 3. Predicted membrane proteins | ZP1      | 3. Predicted membrane proteins |
| <i>ST8SIA5</i>   | 3. Predicted membrane proteins | AATF     | 4. Others                      |
| <i>STARD3</i>    | 3. Predicted membrane proteins | ABI1     | 4. Others                      |
| <i>STIM2</i>     | 3. Predicted membrane proteins | ACMSD    | 4. Others                      |
| <i>SUN3</i>      | 3. Predicted membrane proteins | ACSBG1   | 4. Others                      |
| <i>SV2C</i>      | 3. Predicted membrane proteins | ACTL9    | 4. Others                      |
| <i>SYT14</i>     | 3. Predicted membrane proteins | ADH6     | 4. Others                      |
| <i>SYT6</i>      | 3. Predicted membrane proteins | AK2      | 4. Others                      |
| <i>TAAR8</i>     | 3. Predicted membrane proteins | ALOX12   | 4. Others                      |
| <i>TAAR9</i>     | 3. Predicted membrane proteins | AMY1A    | 4. Others                      |
| <i>TBC1D3G</i>   | 3. Predicted membrane proteins | AMY2A    | 4. Others                      |
| <i>TECRL</i>     | 3. Predicted membrane proteins | ANKFN1   | 4. Others                      |
| <i>TECTB</i>     | 3. Predicted membrane proteins | ANKRD34B | 4. Others                      |
| <i>TMC2</i>      | 3. Predicted membrane proteins | ANKRD7   | 4. Others                      |
| <i>TMEM14C</i>   | 3. Predicted membrane proteins | ANXA7    | 4. Others                      |
| <i>TMEM195</i>   | 3. Predicted membrane proteins | AP3M2    | 4. Others                      |
| <i>TMEM202</i>   | 3. Predicted membrane proteins | APCS     | 4. Others                      |
| <i>TMEM229A</i>  | 3. Predicted membrane proteins | APOA1    | 4. Others                      |
| <i>TMEM72</i>    | 3. Predicted membrane proteins | APPBP2   | 4. Others                      |
| <i>TMPRSS11B</i> | 3. Predicted membrane proteins | ARG1     | 4. Others                      |
| <i>TMPRSS11D</i> | 3. Predicted membrane proteins | ARHGEF9  | 4. Others                      |
| <i>TPCN2</i>     | 3. Predicted membrane proteins | ARID3C   | 4. Others                      |

|                |                                |           |           |
|----------------|--------------------------------|-----------|-----------|
| <i>TPTE</i>    | 3. Predicted membrane proteins | ARL13A    | 4. Others |
| <i>TRPC7</i>   | 3. Predicted membrane proteins | ASCL4     | 4. Others |
| <i>TSN</i>     | 3. Predicted membrane proteins | ASH2L     | 4. Others |
| <i>TSPAN31</i> | 3. Predicted membrane proteins | ATG5      | 4. Others |
| <i>TUSC5</i>   | 3. Predicted membrane proteins | ATOH1     | 4. Others |
| <i>UGT1A9</i>  | 3. Predicted membrane proteins | ATXN8OS   | 4. Others |
| <i>UNC5D</i>   | 3. Predicted membrane proteins | B3GNT7    | 4. Others |
| <i>UPK1A</i>   | 3. Predicted membrane proteins | BCHE      | 4. Others |
| <i>UPK2</i>    | 3. Predicted membrane proteins | BHLHE23   | 4. Others |
| <i>UTS2R</i>   | 3. Predicted membrane proteins | BRF2      | 4. Others |
| <i>ZACN</i>    | 3. Predicted membrane proteins | BSX       | 4. Others |
| <i>ZDHHC22</i> | 3. Predicted membrane proteins | BTBD16    | 4. Others |
| <i>ZNRF4</i>   | 3. Predicted membrane proteins | C10orf53  | 4. Others |
| <i>ZP4</i>     | 3. Predicted membrane proteins | C10orf67  | 4. Others |
| <i>A2ML1</i>   | 4. Others                      | C11orf20  | 4. Others |
| <i>A4GNT</i>   | 4. Others                      | C11orf30  | 4. Others |
| <i>ACTN3</i>   | 4. Others                      | C11orf36  | 4. Others |
| <i>ADH4</i>    | 4. Others                      | C11orf67  | 4. Others |
| <i>ALB</i>     | 4. Others                      | C11orf88  | 4. Others |
| <i>ALOX12</i>  | 4. Others                      | C12orf11  | 4. Others |
| <i>ALX1</i>    | 4. Others                      | C12orf4   | 4. Others |
| <i>ANGPTL3</i> | 4. Others                      | C12orf42  | 4. Others |
| <i>ANKRD33</i> | 4. Others                      | C12orf60  | 4. Others |
| <i>ANKS4B</i>  | 4. Others                      | C12orf74  | 4. Others |
| <i>ANXA10</i>  | 4. Others                      | C13orf28  | 4. Others |
| <i>ANXA13</i>  | 4. Others                      | C13orf30  | 4. Others |
| <i>APCS</i>    | 4. Others                      | C14orf34  | 4. Others |
| <i>APOA1</i>   | 4. Others                      | C15orf50  | 4. Others |
| <i>APOBEC2</i> | 4. Others                      | C16orf73  | 4. Others |
| <i>APOM</i>    | 4. Others                      | C16orf81  | 4. Others |
| <i>AQPEP</i>   | 4. Others                      | C17orf104 | 4. Others |
| <i>ARGFX</i>   | 4. Others                      | C17orf37  | 4. Others |
| <i>ARHGDIG</i> | 4. Others                      | C17orf64  | 4. Others |

|                  |           |           |           |
|------------------|-----------|-----------|-----------|
| <i>ASB10</i>     | 4. Others | C17orf66  | 4. Others |
| <i>ASB17</i>     | 4. Others | C19orf2   | 4. Others |
| <i>ASCL1</i>     | 4. Others | C1orf114  | 4. Others |
| <i>ASH2L</i>     | 4. Others | C1orf125  | 4. Others |
| <i>ASNSD1</i>    | 4. Others | C1orf157  | 4. Others |
| <i>ATXN8OS</i>   | 4. Others | C1orf180  | 4. Others |
| <i>AVP</i>       | 4. Others | C1orf194  | 4. Others |
| <i>B3GALT5</i>   | 4. Others | C1orf92   | 4. Others |
| <i>BANF2</i>     | 4. Others | C1QL2     | 4. Others |
| <i>BCYRN1</i>    | 4. Others | C20orf11  | 4. Others |
| <i>BEYLA</i>     | 4. Others | C20orf4   | 4. Others |
| <i>BHMT</i>      | 4. Others | C20orf43  | 4. Others |
| <i>BIRC8</i>     | 4. Others | C20orf71  | 4. Others |
| <i>BPESC1</i>    | 4. Others | C21orf121 | 4. Others |
| <i>BPIL3</i>     | 4. Others | C21orf54  | 4. Others |
| <i>BPY2</i>      | 4. Others | C21orf90  | 4. Others |
| <i>BRMS1L</i>    | 4. Others | C22orf15  | 4. Others |
| <i>BSX</i>       | 4. Others | C2CD3     | 4. Others |
| <i>BUD31</i>     | 4. Others | C2orf39   | 4. Others |
| <i>C10orf120</i> | 4. Others | C2orf80   | 4. Others |
| <i>C10orf40</i>  | 4. Others | C3orf24   | 4. Others |
| <i>C10orf82</i>  | 4. Others | C4orf11   | 4. Others |
| <i>C10orf90</i>  | 4. Others | C4orf26   | 4. Others |
| <i>C10orf96</i>  | 4. Others | C4orf43   | 4. Others |
| <i>C11orf53</i>  | 4. Others | C4orf50   | 4. Others |
| <i>C11orf64</i>  | 4. Others | C4orf6    | 4. Others |
| <i>C11orf85</i>  | 4. Others | C6orf103  | 4. Others |
| <i>C12orf12</i>  | 4. Others | C6orf176  | 4. Others |
| <i>C12orf36</i>  | 4. Others | C6orf182  | 4. Others |
| <i>C12orf54</i>  | 4. Others | C6orf203  | 4. Others |
| <i>C13orf35</i>  | 4. Others | C6orf218  | 4. Others |
| <i>C14orf105</i> | 4. Others | C6orf222  | 4. Others |
| <i>C15orf29</i>  | 4. Others | C7orf57   | 4. Others |
| <i>C15orf50</i>  | 4. Others | C7orf65   | 4. Others |
| <i>C15orf55</i>  | 4. Others | C7orf66   | 4. Others |
| <i>C16orf73</i>  | 4. Others | C8orf34   | 4. Others |
| <i>C17orf104</i> | 4. Others | C9orf171  | 4. Others |
| <i>C18orf2</i>   | 4. Others | C9orf53   | 4. Others |
| <i>C18orf21</i>  | 4. Others | CACNB2    | 4. Others |
| <i>C19orf12</i>  | 4. Others | CAGE1     | 4. Others |

|                  |           |           |           |
|------------------|-----------|-----------|-----------|
| <i>C19orf2</i>   | 4. Others | CALB1     | 4. Others |
| <i>C19orf47</i>  | 4. Others | CAPNS2    | 4. Others |
| <i>C1QL2</i>     | 4. Others | CASC3     | 4. Others |
| <i>C1QL4</i>     | 4. Others | CBWD5     | 4. Others |
| <i>C1QTNF9B</i>  | 4. Others | CBX1      | 4. Others |
| <i>C20orf185</i> | 4. Others | CCDC117   | 4. Others |
| <i>C20orf186</i> | 4. Others | CCDC144NL | 4. Others |
| <i>C20orf71</i>  | 4. Others | CCDC33    | 4. Others |
| <i>C21orf131</i> | 4. Others | CCDC77    | 4. Others |
| <i>C21orf88</i>  | 4. Others | CCDC83    | 4. Others |
| <i>C2orf84</i>   | 4. Others | CCT2      | 4. Others |
| <i>C4orf40</i>   | 4. Others | CCT6A     | 4. Others |
| <i>C4orf6</i>    | 4. Others | CDC123    | 4. Others |
| <i>C6orf142</i>  | 4. Others | CDC20B    | 4. Others |
| <i>C6orf176</i>  | 4. Others | CDC5L     | 4. Others |
| <i>C6orf57</i>   | 4. Others | CELA2A    | 4. Others |
| <i>C7orf33</i>   | 4. Others | CELA3A    | 4. Others |
| <i>C7orf52</i>   | 4. Others | CELF3     | 4. Others |
| <i>C8A</i>       | 4. Others | CELF4     | 4. Others |
| <i>C8orf74</i>   | 4. Others | CGA       | 4. Others |
| <i>C9</i>        | 4. Others | CGB1      | 4. Others |
| <i>C9orf27</i>   | 4. Others | CHAT      | 4. Others |
| <i>CA10</i>      | 4. Others | CHD5      | 4. Others |
| <i>CABP2</i>     | 4. Others | CHRDL2    | 4. Others |
| <i>CACNB2</i>    | 4. Others | CHST4     | 4. Others |
| <i>CALB1</i>     | 4. Others | CLEC18C   | 4. Others |
| <i>CALCA</i>     | 4. Others | CLLU1OS   | 4. Others |
| <i>CALM2</i>     | 4. Others | CLNS1A    | 4. Others |
| <i>CALML3</i>    | 4. Others | CLRN1OS   | 4. Others |
| <i>CALML5</i>    | 4. Others | CLVS1     | 4. Others |
| <i>CALR3</i>     | 4. Others | CMAS      | 4. Others |
| <i>CAND1</i>     | 4. Others | CNDP1     | 4. Others |
| <i>CAPNS2</i>    | 4. Others | COL11A2   | 4. Others |
| <i>CAPZA2</i>    | 4. Others | COL29A1   | 4. Others |
| <i>CARD17</i>    | 4. Others | CPLX3     | 4. Others |
| <i>CBLN2</i>     | 4. Others | CPNE1     | 4. Others |
| <i>CBRI</i>      | 4. Others | CPNE4     | 4. Others |
| <i>CCDC105</i>   | 4. Others | CRMP1     | 4. Others |
| <i>CCL1</i>      | 4. Others | CRP       | 4. Others |
| <i>CCT2</i>      | 4. Others | CRYGB     | 4. Others |

|                 |           |                |           |
|-----------------|-----------|----------------|-----------|
| <i>CDX2</i>     | 4. Others | <i>CSAG3</i>   | 4. Others |
| <i>CEACAM18</i> | 4. Others | <i>CSH1</i>    | 4. Others |
| <i>CEL</i>      | 4. Others | <i>CSHL1</i>   | 4. Others |
| <i>CELF3</i>    | 4. Others | <i>CST5</i>    | 4. Others |
| <i>CETN1</i>    | 4. Others | <i>CSTF1</i>   | 4. Others |
| <i>CGB</i>      | 4. Others | <i>CT45A3</i>  | 4. Others |
| <i>CGB2</i>     | 4. Others | <i>CT45A6</i>  | 4. Others |
| <i>CGB5</i>     | 4. Others | <i>CT47B1</i>  | 4. Others |
| <i>CHD5</i>     | 4. Others | <i>CTNNA2</i>  | 4. Others |
| <i>CHST8</i>    | 4. Others | <i>CTTN</i>    | 4. Others |
| <i>CIAO1</i>    | 4. Others | <i>CWC25</i>   | 4. Others |
| <i>CIDEC</i>    | 4. Others | <i>CXorf30</i> | 4. Others |
| <i>CLEC18C</i>  | 4. Others | <i>CXorf48</i> | 4. Others |
| <i>CNBD1</i>    | 4. Others | <i>CXorf51</i> | 4. Others |
| <i>CNDP1</i>    | 4. Others | <i>CXorf65</i> | 4. Others |
| <i>CNOT2</i>    | 4. Others | <i>CYP17A1</i> | 4. Others |
| <i>COL11A2</i>  | 4. Others | <i>CYP2A6</i>  | 4. Others |
| <i>COL2A1</i>   | 4. Others | <i>CYP2A7</i>  | 4. Others |
| <i>CPA5</i>     | 4. Others | <i>DAB1</i>    | 4. Others |
| <i>CPLX2</i>    | 4. Others | <i>DAZ1</i>    | 4. Others |
| <i>CPLX3</i>    | 4. Others | <i>DCDC2B</i>  | 4. Others |
| <i>CPN1</i>     | 4. Others | <i>DDHD2</i>   | 4. Others |
| <i>CPS1</i>     | 4. Others | <i>DDX25</i>   | 4. Others |
| <i>CRIP3</i>    | 4. Others | <i>DDX42</i>   | 4. Others |
| <i>CRKL</i>     | 4. Others | <i>DDX47</i>   | 4. Others |
| <i>CRMP1</i>    | 4. Others | <i>DEFB115</i> | 4. Others |
| <i>CRP</i>      | 4. Others | <i>DEFB123</i> | 4. Others |
| <i>CRYGA</i>    | 4. Others | <i>DEFB129</i> | 4. Others |
| <i>CRYGB</i>    | 4. Others | <i>DEFB135</i> | 4. Others |
| <i>CRYGC</i>    | 4. Others | <i>DERA</i>    | 4. Others |
| <i>CSAG1</i>    | 4. Others | <i>DLX5</i>    | 4. Others |
| <i>CSAG3</i>    | 4. Others | <i>DLX6</i>    | 4. Others |
| <i>CSH1</i>     | 4. Others | <i>DMRTA2</i>  | 4. Others |
| <i>CSN2</i>     | 4. Others | <i>DNAH17</i>  | 4. Others |
| <i>CST11</i>    | 4. Others | <i>DNAJB13</i> | 4. Others |
| <i>CST9</i>     | 4. Others | <i>DYDC1</i>   | 4. Others |
| <i>CT47A1</i>   | 4. Others | <i>EDDM3B</i>  | 4. Others |
| <i>CT47A11</i>  | 4. Others | <i>EFCAB10</i> | 4. Others |
| <i>CT47A2</i>   | 4. Others | <i>EFCAB3</i>  | 4. Others |
| <i>CT47A6</i>   | 4. Others | <i>EGR4</i>    | 4. Others |

|                     |           |                 |           |
|---------------------|-----------|-----------------|-----------|
| <i>CTNNA2</i>       | 4. Others | <i>EID2</i>     | 4. Others |
| <i>CTNNA3</i>       | 4. Others | <i>ELSPBP1</i>  | 4. Others |
| <i>CXorf27</i>      | 4. Others | <i>EPHX3</i>    | 4. Others |
| <i>CXorf48</i>      | 4. Others | <i>EPO</i>      | 4. Others |
| <i>CXorf51</i>      | 4. Others | <i>ERLIN2</i>   | 4. Others |
| <i>CXorf64</i>      | 4. Others | <i>EXOC2</i>    | 4. Others |
| <i>CYLC1</i>        | 4. Others | <i>FABP6</i>    | 4. Others |
| <i>CYLC2</i>        | 4. Others | <i>FADD</i>     | 4. Others |
| <i>CYP11B2</i>      | 4. Others | <i>FAM133A</i>  | 4. Others |
| <i>CYP2A6</i>       | 4. Others | <i>FAM150B</i>  | 4. Others |
| <i>CYP2A7</i>       | 4. Others | <i>FAM153B</i>  | 4. Others |
| <i>CYP2C19</i>      | 4. Others | <i>FAM177B</i>  | 4. Others |
| <i>CYP2W1</i>       | 4. Others | <i>FAM19A4</i>  | 4. Others |
| <i>DAB1</i>         | 4. Others | <i>FAM24A</i>   | 4. Others |
| <i>DAZ2</i>         | 4. Others | <i>FAM27L</i>   | 4. Others |
| <i>DAZ3</i>         | 4. Others | <i>FAM99A</i>   | 4. Others |
| <i>DCTN2</i>        | 4. Others | <i>FBXL13</i>   | 4. Others |
| <i>DDHD2</i>        | 4. Others | <i>FBXL20</i>   | 4. Others |
| <i>DDX25</i>        | 4. Others | <i>FCRLB</i>    | 4. Others |
| <i>DEFB115</i>      | 4. Others | <i>FKBP6</i>    | 4. Others |
| <i>DEFB118</i>      | 4. Others | <i>FLJ25363</i> | 4. Others |
| <i>DEFB119</i>      | 4. Others | <i>FLJ37543</i> | 4. Others |
| <i>DEFB131</i>      | 4. Others | <i>FOXE3</i>    | 4. Others |
| <i>DGKB</i>         | 4. Others | <i>FOXI2</i>    | 4. Others |
| <i>DHRS2</i>        | 4. Others | <i>FOXN4</i>    | 4. Others |
| <i>DKFZP434L187</i> | 4. Others | <i>FRMPD4</i>   | 4. Others |
| <i>DKFZp434L192</i> | 4. Others | <i>FSD1</i>     | 4. Others |
| <i>DLX1</i>         | 4. Others | <i>FTCD</i>     | 4. Others |
| <i>DLX2</i>         | 4. Others | <i>FTHL17</i>   | 4. Others |
| <i>DLX6AS</i>       | 4. Others | <i>FTSJ3</i>    | 4. Others |
| <i>DMRTB1</i>       | 4. Others | <i>G6PD</i>     | 4. Others |
| <i>DNM1L</i>        | 4. Others | <i>GABPB1</i>   | 4. Others |
| <i>DPEP3</i>        | 4. Others | <i>GAD1</i>     | 4. Others |
| <i>DPPA2</i>        | 4. Others | <i>GAGE1</i>    | 4. Others |
| <i>DSCR10</i>       | 4. Others | <i>GAGE12D</i>  | 4. Others |
| <i>DSCR4</i>        | 4. Others | <i>GAGE12F</i>  | 4. Others |
| <i>DUSP21</i>       | 4. Others | <i>GAGE12J</i>  | 4. Others |
| <i>DUSP27</i>       | 4. Others | <i>GAGE13</i>   | 4. Others |
| <i>DYSFIP1</i>      | 4. Others | <i>GAGE2A</i>   | 4. Others |
| <i>EAPP</i>         | 4. Others | <i>GAGE2B</i>   | 4. Others |

|                 |           |                  |           |
|-----------------|-----------|------------------|-----------|
| <i>EFNA2</i>    | 4. Others | <i>GAGE2C</i>    | 4. Others |
| <i>ELP2</i>     | 4. Others | <i>GAGE2D</i>    | 4. Others |
| <i>EMX1</i>     | 4. Others | <i>GAGE2E</i>    | 4. Others |
| <i>EMX2OS</i>   | 4. Others | <i>GAGE4</i>     | 4. Others |
| <i>EPS8L3</i>   | 4. Others | <i>GATA5</i>     | 4. Others |
| <i>ESRRB</i>    | 4. Others | <i>GBA3</i>      | 4. Others |
| <i>EVX2</i>     | 4. Others | <i>GDF9</i>      | 4. Others |
| <i>EXOC3</i>    | 4. Others | <i>GIT1</i>      | 4. Others |
| <i>F13B</i>     | 4. Others | <i>GLA</i>       | 4. Others |
| <i>FABP7</i>    | 4. Others | <i>GLB1L3</i>    | 4. Others |
| <i>FAM119B</i>  | 4. Others | <i>GNAS</i>      | 4. Others |
| <i>FAM133A</i>  | 4. Others | <i>GNAT1</i>     | 4. Others |
| <i>FAM196A</i>  | 4. Others | <i>GNG3</i>      | 4. Others |
| <i>FAM197Y2</i> | 4. Others | <i>GOLGA7</i>    | 4. Others |
| <i>FAM19A4</i>  | 4. Others | <i>GOLGA8F</i>   | 4. Others |
| <i>FAM27L</i>   | 4. Others | <i>GPC5</i>      | 4. Others |
| <i>FAM41AY1</i> | 4. Others | <i>GPN1</i>      | 4. Others |
| <i>FAM41C</i>   | 4. Others | <i>GRB7</i>      | 4. Others |
| <i>FAM47A</i>   | 4. Others | <i>GSTA2</i>     | 4. Others |
| <i>FAM47B</i>   | 4. Others | <i>GTSF1</i>     | 4. Others |
| <i>FAM5B</i>    | 4. Others | <i>GTSF1L</i>    | 4. Others |
| <i>FAM69C</i>   | 4. Others | <i>H2AFB1</i>    | 4. Others |
| <i>FAM83C</i>   | 4. Others | <i>HAL</i>       | 4. Others |
| <i>FAM99B</i>   | 4. Others | <i>HAR1B</i>     | 4. Others |
| <i>FAM9A</i>    | 4. Others | <i>HEATR6</i>    | 4. Others |
| <i>FCN2</i>     | 4. Others | <i>HEBP1</i>     | 4. Others |
| <i>FGF19</i>    | 4. Others | <i>HES7</i>      | 4. Others |
| <i>FGF3</i>     | 4. Others | <i>HIST1H1T</i>  | 4. Others |
| <i>FGF4</i>     | 4. Others | <i>HIST1H2BA</i> | 4. Others |
| <i>FGF5</i>     | 4. Others | <i>HIST1H4B</i>  | 4. Others |
| <i>FGF8</i>     | 4. Others | <i>HMGA2</i>     | 4. Others |
| <i>FLJ25328</i> | 4. Others | <i>HMP19</i>     | 4. Others |
| <i>FLJ41941</i> | 4. Others | <i>HMSD</i>      | 4. Others |
| <i>FLJ43859</i> | 4. Others | <i>HMX1</i>      | 4. Others |
| <i>FOXB1</i>    | 4. Others | <i>HNRNPCL1</i>  | 4. Others |
| <i>FOXB2</i>    | 4. Others | <i>HOXB8</i>     | 4. Others |
| <i>FOXD1</i>    | 4. Others | <i>HOXB9</i>     | 4. Others |
| <i>FOXE3</i>    | 4. Others | <i>HOXC12</i>    | 4. Others |
| <i>FOXH1</i>    | 4. Others | <i>HOXD13</i>    | 4. Others |
| <i>FOXJ1</i>    | 4. Others | <i>HSD17B1</i>   | 4. Others |



|                  |           |            |           |
|------------------|-----------|------------|-----------|
| <i>FOXI3</i>     | 4. Others | HUS1B      | 4. Others |
| <i>FOXN4</i>     | 4. Others | IFNA10     | 4. Others |
| <i>FOXR2</i>     | 4. Others | IFNA16     | 4. Others |
| <i>FRG2</i>      | 4. Others | IGF2BP3    | 4. Others |
| <i>FRMD1</i>     | 4. Others | IGFL3      | 4. Others |
| <i>FRS2</i>      | 4. Others | IGHMBP2    | 4. Others |
| <i>FSD2</i>      | 4. Others | IHH        | 4. Others |
| <i>FSHB</i>      | 4. Others | IL17C      | 4. Others |
| <i>FTCD</i>      | 4. Others | IL1F10     | 4. Others |
| <i>FTMT</i>      | 4. Others | IL1F5      | 4. Others |
| <i>GADL1</i>     | 4. Others | IL23A      | 4. Others |
| <i>GAGE12D</i>   | 4. Others | IL25       | 4. Others |
| <i>GAGE12F</i>   | 4. Others | IL28A      | 4. Others |
| <i>GAGE13</i>    | 4. Others | IL29       | 4. Others |
| <i>GAGE2B</i>    | 4. Others | INA        | 4. Others |
| <i>GAGE2E</i>    | 4. Others | ING1       | 4. Others |
| <i>GAST</i>      | 4. Others | INS        | 4. Others |
| <i>GBX2</i>      | 4. Others | INTS4      | 4. Others |
| <i>GCKR</i>      | 4. Others | IQSEC2     | 4. Others |
| <i>GDNF</i>      | 4. Others | ISL1       | 4. Others |
| <i>GLYATL1</i>   | 4. Others | ISL2       | 4. Others |
| <i>GLYATL2</i>   | 4. Others | ITIH1      | 4. Others |
| <i>GNS</i>       | 4. Others | IVL        | 4. Others |
| <i>GOLGA7</i>    | 4. Others | KCTD21     | 4. Others |
| <i>GPKOW</i>     | 4. Others | KDM2A      | 4. Others |
| <i>GSC2</i>      | 4. Others | KIAA0020   | 4. Others |
| <i>GSTP1</i>     | 4. Others | KLHDC3     | 4. Others |
| <i>GTF2B</i>     | 4. Others | KRT10      | 4. Others |
| <i>GTF3C5</i>    | 4. Others | KRT2       | 4. Others |
| <i>GYS2</i>      | 4. Others | KRT31      | 4. Others |
| <i>H2AFB1</i>    | 4. Others | KRT33A     | 4. Others |
| <i>HBE1</i>      | 4. Others | KRT39      | 4. Others |
| <i>HIST1H1A</i>  | 4. Others | KRT75      | 4. Others |
| <i>HIST1H2AA</i> | 4. Others | KRT79      | 4. Others |
| <i>HIST1H2AD</i> | 4. Others | KRT83      | 4. Others |
| <i>HIST1H2AH</i> | 4. Others | KRT9       | 4. Others |
| <i>HIST1H2BA</i> | 4. Others | KRTAP10-11 | 4. Others |
| <i>HIST1H3C</i>  | 4. Others | KRTAP10-3  | 4. Others |
| <i>HIST1H4L</i>  | 4. Others | KRTAP10-5  | 4. Others |
| <i>HMGB4</i>     | 4. Others | KRTAP10-7  | 4. Others |

|                 |           |              |           |
|-----------------|-----------|--------------|-----------|
| <i>HMP19</i>    | 4. Others | KRTAP19-1    | 4. Others |
| <i>HNRNPCL1</i> | 4. Others | KRTAP19-8    | 4. Others |
| <i>HOTAIR</i>   | 4. Others | KRTAP20-4    | 4. Others |
| <i>HOXA11</i>   | 4. Others | KRTAP21-1    | 4. Others |
| <i>HOXA11AS</i> | 4. Others | KRTAP4-3     | 4. Others |
| <i>HOXA9</i>    | 4. Others | KRTAP5-6     | 4. Others |
| <i>HOXB13</i>   | 4. Others | KRTAP6-3     | 4. Others |
| <i>HOXD12</i>   | 4. Others | KRTAP9-9     | 4. Others |
| <i>HPD</i>      | 4. Others | LANCL2       | 4. Others |
| <i>HPVC1</i>    | 4. Others | LASP1        | 4. Others |
| <i>HRNBP3</i>   | 4. Others | LCE1A        | 4. Others |
| <i>HTN1</i>     | 4. Others | LCE1F        | 4. Others |
| <i>IFNA16</i>   | 4. Others | LCE2B        | 4. Others |
| <i>IFNA2</i>    | 4. Others | LCE3C        | 4. Others |
| <i>IFNA4</i>    | 4. Others | LCE3E        | 4. Others |
| <i>IFNA7</i>    | 4. Others | LCNL1        | 4. Others |
| <i>IFNE</i>     | 4. Others | LEFTY1       | 4. Others |
| <i>IGF2AS</i>   | 4. Others | LHELP1       | 4. Others |
| <i>IGFBP1</i>   | 4. Others | LEUTX        | 4. Others |
| <i>IL28A</i>    | 4. Others | LGALS13      | 4. Others |
| <i>IL29</i>     | 4. Others | LGALS7B      | 4. Others |
| <i>INHBE</i>    | 4. Others | LGALS9B      | 4. Others |
| <i>INPP5F</i>   | 4. Others | LGI3         | 4. Others |
| <i>INS</i>      | 4. Others | LPI          | 4. Others |
| <i>INSM1</i>    | 4. Others | LIX1         | 4. Others |
| <i>IQCF2</i>    | 4. Others | LLPH         | 4. Others |
| <i>IQCJ</i>     | 4. Others | LOC100131726 | 4. Others |
| <i>ISL1</i>     | 4. Others | LOC100287704 | 4. Others |
| <i>ISM2</i>     | 4. Others | LOC255025    | 4. Others |
| <i>KHDC1L</i>   | 4. Others | LOC283856    | 4. Others |
| <i>KIF5C</i>    | 4. Others | LOC284551    | 4. Others |
| <i>KLK14</i>    | 4. Others | LOC285629    | 4. Others |
| <i>KLK8</i>     | 4. Others | LOC339568    | 4. Others |
| <i>KRT12</i>    | 4. Others | LOC645323    | 4. Others |
| <i>KRT25</i>    | 4. Others | LOC723809    | 4. Others |
| <i>KRT26</i>    | 4. Others | LOC90110     | 4. Others |
| <i>KRT3</i>     | 4. Others | LPO          | 4. Others |
| <i>KRT33A</i>   | 4. Others | LSM1         | 4. Others |
| <i>KRT35</i>    | 4. Others | LSM14A       | 4. Others |
| <i>KRT81</i>    | 4. Others | LTV1         | 4. Others |

|                   |           |            |           |
|-------------------|-----------|------------|-----------|
| <i>KRTAP10-1</i>  | 4. Others | LYZL6      | 4. Others |
| <i>KRTAP10-12</i> | 4. Others | MAEL       | 4. Others |
| <i>KRTAP10-3</i>  | 4. Others | MAGEA8     | 4. Others |
| <i>KRTAP10-9</i>  | 4. Others | MAPKAP1    | 4. Others |
| <i>KRTAP12-2</i>  | 4. Others | MATN4      | 4. Others |
| <i>KRTAP12-4</i>  | 4. Others | MBD3L1     | 4. Others |
| <i>KRTAP1-3</i>   | 4. Others | MBD3L5     | 4. Others |
| <i>KRTAP17-1</i>  | 4. Others | MCF2       | 4. Others |
| <i>KRTAP19-1</i>  | 4. Others | MCM3AP     | 4. Others |
| <i>KRTAP19-3</i>  | 4. Others | MDM2       | 4. Others |
| <i>KRTAP19-5</i>  | 4. Others | MDS2       | 4. Others |
| <i>KRTAP20-4</i>  | 4. Others | MED1       | 4. Others |
| <i>KRTAP21-2</i>  | 4. Others | MEPE       | 4. Others |
| <i>KRTAP3-1</i>   | 4. Others | MGC16025   | 4. Others |
| <i>KRTAP4-11</i>  | 4. Others | MIMT1      | 4. Others |
| <i>KRTAP4-12</i>  | 4. Others | MIOX       | 4. Others |
| <i>KRTAP4-2</i>   | 4. Others | MIXL1      | 4. Others |
| <i>KRTAP4-4</i>   | 4. Others | MLLT11     | 4. Others |
| <i>KRTAP4-5</i>   | 4. Others | MLN        | 4. Others |
| <i>KRTAP4-7</i>   | 4. Others | MORN5      | 4. Others |
| <i>KRTAP5-11</i>  | 4. Others | MPPED1     | 4. Others |
| <i>KRTAP6-3</i>   | 4. Others | MRPL45     | 4. Others |
| <i>KRTAP8-1</i>   | 4. Others | MSL1       | 4. Others |
| <i>KRTAP9-2</i>   | 4. Others | MT1B       | 4. Others |
| <i>KRTAP9-4</i>   | 4. Others | MT1H       | 4. Others |
| <i>KRTAP9-9</i>   | 4. Others | MT3        | 4. Others |
| <i>LACRT</i>      | 4. Others | MT4        | 4. Others |
| <i>LANCL2</i>     | 4. Others | MUC2       | 4. Others |
| <i>LBP</i>        | 4. Others | MYBPC3     | 4. Others |
| <i>LCE1F</i>      | 4. Others | MYBPHL     | 4. Others |
| <i>LCE3A</i>      | 4. Others | MYST2      | 4. Others |
| <i>LCE3E</i>      | 4. Others | NAA38      | 4. Others |
| <i>LCN9</i>       | 4. Others | NAF1       | 4. Others |
| <i>LDHAL6A</i>    | 4. Others | NANOS1     | 4. Others |
| <i>LECT2</i>      | 4. Others | NAPB       | 4. Others |
| <i>LEUTX</i>      | 4. Others | NARS2      | 4. Others |
| <i>LGALS13</i>    | 4. Others | NCAPD2     | 4. Others |
| <i>LIMS3</i>      | 4. Others | NCRNA00158 | 4. Others |
| <i>LIPK</i>       | 4. Others | NCRNA00207 | 4. Others |
| <i>LLPH</i>       | 4. Others | NEU4       | 4. Others |

|                     |           |         |           |
|---------------------|-----------|---------|-----------|
| <i>LOC100130238</i> | 4. Others | NHLH2   | 4. Others |
| <i>LOC100130274</i> | 4. Others | NOL4    | 4. Others |
| <i>LOC100287704</i> | 4. Others | NOP2    | 4. Others |
| <i>LOC144776</i>    | 4. Others | NPB     | 4. Others |
| <i>LOC200726</i>    | 4. Others | NPS     | 4. Others |
| <i>LOC255025</i>    | 4. Others | NPVF    | 4. Others |
| <i>LOC283332</i>    | 4. Others | NSMCE4A | 4. Others |
| <i>LOC283867</i>    | 4. Others | NUDT9   | 4. Others |
| <i>LOC283914</i>    | 4. Others | NXF3    | 4. Others |
| <i>LOC284661</i>    | 4. Others | OGDHL   | 4. Others |
| <i>LOC285370</i>    | 4. Others | OLIG1   | 4. Others |
| <i>LOC286135</i>    | 4. Others | ONECUT3 | 4. Others |
| <i>LOC286238</i>    | 4. Others | OR2W5   | 4. Others |
| <i>LOC29034</i>     | 4. Others | OR4C45  | 4. Others |
| <i>LOC340074</i>    | 4. Others | ORAOV1  | 4. Others |
| <i>LOC348021</i>    | 4. Others | OS9     | 4. Others |
| <i>LOC360030</i>    | 4. Others | OSBPL2  | 4. Others |
| <i>LOC643763</i>    | 4. Others | PADI1   | 4. Others |
| <i>LOC648691</i>    | 4. Others | PAGE3   | 4. Others |
| <i>LOC727924</i>    | 4. Others | PAPL    | 4. Others |
| <i>LYZL6</i>        | 4. Others | PAX6    | 4. Others |
| <i>MAEL</i>         | 4. Others | PCGEM1  | 4. Others |
| <i>MAGEA5</i>       | 4. Others | PCGF2   | 4. Others |
| <i>MAGEA8</i>       | 4. Others | PCSK1   | 4. Others |
| <i>MAGEB10</i>      | 4. Others | PDCL2   | 4. Others |
| <i>MAGEB18</i>      | 4. Others | PDE6A   | 4. Others |
| <i>MAGEB3</i>       | 4. Others | PDIA2   | 4. Others |
| <i>MBD3L1</i>       | 4. Others | PDSS2   | 4. Others |
| <i>MBD3L2</i>       | 4. Others | PEX5L   | 4. Others |
| <i>MBD3L5</i>       | 4. Others | PGBD5   | 4. Others |
| <i>MCF2</i>         | 4. Others | PGLYRP4 | 4. Others |
| <i>MDM2</i>         | 4. Others | PHB     | 4. Others |
| <i>MED28</i>        | 4. Others | PHB2    | 4. Others |
| <i>MED31</i>        | 4. Others | PIP4K2B | 4. Others |
| <i>MEPE</i>         | 4. Others | PIPOX   | 4. Others |
| <i>MGC4473</i>      | 4. Others | PISRT1  | 4. Others |
| <i>MIA</i>          | 4. Others | PIWIL1  | 4. Others |
| <i>MLN</i>          | 4. Others | PKLR    | 4. Others |
| <i>MSMP</i>         | 4. Others | PLAC1L  | 4. Others |
| <i>MTMR7</i>        | 4. Others | PLK5P   | 4. Others |

|                   |           |                 |           |
|-------------------|-----------|-----------------|-----------|
| <i>MTTP</i>       | 4. Others | <i>PLOD1</i>    | 4. Others |
| <i>MUC2</i>       | 4. Others | <i>PNLIPRP2</i> | 4. Others |
| <i>MUC6</i>       | 4. Others | <i>PNMA5</i>    | 4. Others |
| <i>MUCL1</i>      | 4. Others | <i>PNPLA1</i>   | 4. Others |
| <i>MYBPC1</i>     | 4. Others | <i>POLDIP2</i>  | 4. Others |
| <i>MYF5</i>       | 4. Others | <i>POP4</i>     | 4. Others |
| <i>MYL7</i>       | 4. Others | <i>POU3F2</i>   | 4. Others |
| <i>MYO18B</i>     | 4. Others | <i>POU4F3</i>   | 4. Others |
| <i>MYO1A</i>      | 4. Others | <i>PPIAL4B</i>  | 4. Others |
| <i>MYPN</i>       | 4. Others | <i>PPM1D</i>    | 4. Others |
| <i>NBPF6</i>      | 4. Others | <i>PPME1</i>    | 4. Others |
| <i>NCRNA00029</i> | 4. Others | <i>PPP1R1C</i>  | 4. Others |
| <i>NCRNA00052</i> | 4. Others | <i>PPP1R3D</i>  | 4. Others |
| <i>NCRNA00112</i> | 4. Others | <i>PPP2R1A</i>  | 4. Others |
| <i>NCRNA00157</i> | 4. Others | <i>PPP2R5D</i>  | 4. Others |
| <i>NCRNA00207</i> | 4. Others | <i>PRAC</i>     | 4. Others |
| <i>NECAB2</i>     | 4. Others | <i>PRAMEF1</i>  | 4. Others |
| <i>NEFH</i>       | 4. Others | <i>PRAMEF13</i> | 4. Others |
| <i>NEFL</i>       | 4. Others | <i>PRAMEF5</i>  | 4. Others |
| <i>NEFM</i>       | 4. Others | <i>PRB3</i>     | 4. Others |
| <i>NEU2</i>       | 4. Others | <i>PREP</i>     | 4. Others |
| <i>NFU1</i>       | 4. Others | <i>PRKACB</i>   | 4. Others |
| <i>NGDN</i>       | 4. Others | <i>PRM1</i>     | 4. Others |
| <i>NKX2-3</i>     | 4. Others | <i>PRM2</i>     | 4. Others |
| <i>NKX2-4</i>     | 4. Others | <i>PRMT8</i>    | 4. Others |
| <i>NKX2-6</i>     | 4. Others | <i>PRODH2</i>   | 4. Others |
| <i>NLRP11</i>     | 4. Others | <i>PROSC</i>    | 4. Others |
| <i>NOBOX</i>      | 4. Others | <i>PROZ</i>     | 4. Others |
| <i>NOLA</i>       | 4. Others | <i>PRPF18</i>   | 4. Others |
| <i>NPAS3</i>      | 4. Others | <i>PRTN3</i>    | 4. Others |
| <i>NPVF</i>       | 4. Others | <i>PSG5</i>     | 4. Others |
| <i>NR1H4</i>      | 4. Others | <i>PSMA8</i>    | 4. Others |
| <i>NR1I2</i>      | 4. Others | <i>PSMD11</i>   | 4. Others |
| <i>NR5A1</i>      | 4. Others | <i>PSMD3</i>    | 4. Others |
| <i>NT5C1A</i>     | 4. Others | <i>PSMD8</i>    | 4. Others |
| <i>NTNG2</i>      | 4. Others | <i>PSORS1C2</i> | 4. Others |
| <i>NTS</i>        | 4. Others | <i>PTH</i>      | 4. Others |
| <i>NXPPI</i>      | 4. Others | <i>PYDC2</i>    | 4. Others |
| <i>OBP2A</i>      | 4. Others | <i>PYY</i>      | 4. Others |
| <i>OCM2</i>       | 4. Others | <i>PZP</i>      | 4. Others |

|                |           |          |           |
|----------------|-----------|----------|-----------|
| <i>ODC1</i>    | 4. Others | QRSL1    | 4. Others |
| <i>OLFM4</i>   | 4. Others | RAB21    | 4. Others |
| <i>OLIG2</i>   | 4. Others | RAB22A   | 4. Others |
| <i>ONECUT3</i> | 4. Others | RAB6A    | 4. Others |
| <i>OR2W5</i>   | 4. Others | RAP1B    | 4. Others |
| <i>OR9G9</i>   | 4. Others | RASGEF1C | 4. Others |
| <i>OS9</i>     | 4. Others | RBBP7    | 4. Others |
| <i>OSBPL2</i>  | 4. Others | RBM17    | 4. Others |
| <i>OTOS</i>    | 4. Others | RBP2     | 4. Others |
| <i>OTUD6A</i>  | 4. Others | RDH12    | 4. Others |
| <i>OXT</i>     | 4. Others | REG1B    | 4. Others |
| <i>PADI3</i>   | 4. Others | REG4     | 4. Others |
| <i>PAGE3</i>   | 4. Others | RGS20    | 4. Others |
| <i>PAPL</i>    | 4. Others | RGS7     | 4. Others |
| <i>PATE1</i>   | 4. Others | RNASE10  | 4. Others |
| <i>PAX4</i>    | 4. Others | RNASE9   | 4. Others |
| <i>PAX7</i>    | 4. Others | RNF114   | 4. Others |
| <i>PCID2</i>   | 4. Others | RNF8     | 4. Others |
| <i>PCSK1</i>   | 4. Others | RPL19    | 4. Others |
| <i>PDIA2</i>   | 4. Others | RSF1     | 4. Others |
| <i>PDZK1</i>   | 4. Others | RTN4IP1  | 4. Others |
| <i>PEX5L</i>   | 4. Others | RUNDC3A  | 4. Others |
| <i>PF4V1</i>   | 4. Others | SALL3    | 4. Others |
| <i>PFDN5</i>   | 4. Others | SAMD4B   | 4. Others |
| <i>PGLYRP3</i> | 4. Others | SAPS3    | 4. Others |
| <i>PHF21B</i>  | 4. Others | SBSN     | 4. Others |
| <i>PITX3</i>   | 4. Others | SCARNA14 | 4. Others |
| <i>PIWIL1</i>  | 4. Others | SCARNA18 | 4. Others |
| <i>PIWIL2</i>  | 4. Others | SCARNA23 | 4. Others |
| <i>PLAC1L</i>  | 4. Others | SCARNA7  | 4. Others |
| <i>PLAC4</i>   | 4. Others | SCG2     | 4. Others |
| <i>PNMA5</i>   | 4. Others | SCRG1    | 4. Others |
| <i>POLR3H</i>  | 4. Others | SCRT1    | 4. Others |
| <i>POP4</i>    | 4. Others | SEC14L4  | 4. Others |
| <i>POTEA</i>   | 4. Others | SEPHS1   | 4. Others |
| <i>POTEC</i>   | 4. Others | SH2D5    | 4. Others |
| <i>POTED</i>   | 4. Others | SH2D6    | 4. Others |
| <i>POTEH</i>   | 4. Others | SH3GL3   | 4. Others |
| <i>POU3F2</i>  | 4. Others | SIAH3    | 4. Others |
| <i>POU4F3</i>  | 4. Others | SLIT1    | 4. Others |

|                 |           |         |           |
|-----------------|-----------|---------|-----------|
| <i>PPP1R3D</i>  | 4. Others | SLURP1  | 4. Others |
| <i>PPP2R1B</i>  | 4. Others | SMARCD2 | 4. Others |
| <i>PPP2R3C</i>  | 4. Others | SMARCE1 | 4. Others |
| <i>PRAMEF1</i>  | 4. Others | SNAP25  | 4. Others |
| <i>PRAMEF10</i> | 4. Others | SNAR-B2 | 4. Others |
| <i>PRAMEF11</i> | 4. Others | SNF8    | 4. Others |
| <i>PRAMEF13</i> | 4. Others | SNX11   | 4. Others |
| <i>PRAMEF14</i> | 4. Others | SPAG6   | 4. Others |
| <i>PRAMEF16</i> | 4. Others | SPANXN1 | 4. Others |
| <i>PRAMEF2</i>  | 4. Others | SPANXN2 | 4. Others |
| <i>PRAMEF20</i> | 4. Others | SPANXN3 | 4. Others |
| <i>PRAMEF4</i>  | 4. Others | SPATA2  | 4. Others |
| <i>PRAMEF5</i>  | 4. Others | SPERT   | 4. Others |
| <i>PRAMEF8</i>  | 4. Others | SSX7    | 4. Others |
| <i>PRAMEF9</i>  | 4. Others | ST18    | 4. Others |
| <i>PRIM2</i>    | 4. Others | STAG3   | 4. Others |
| <i>PRM2</i>     | 4. Others | STAU1   | 4. Others |
| <i>PRM3</i>     | 4. Others | STMN4   | 4. Others |
| <i>PROL1</i>    | 4. Others | STRADA  | 4. Others |
| <i>PRR23A</i>   | 4. Others | STRAP   | 4. Others |
| <i>PRR25</i>    | 4. Others | STXBP5L | 4. Others |
| <i>PRR4</i>     | 4. Others | SULT1B1 | 4. Others |
| <i>PRSS1</i>    | 4. Others | SUPT5H  | 4. Others |
| <i>PSG1</i>     | 4. Others | SUPV3L1 | 4. Others |
| <i>PSG11</i>    | 4. Others | SYN1    | 4. Others |
| <i>PSG7</i>     | 4. Others | TAF4    | 4. Others |
| <i>PSG8</i>     | 4. Others | TAF7L   | 4. Others |
| <i>PSMA8</i>    | 4. Others | TBX4    | 4. Others |
| <i>PTGR1</i>    | 4. Others | TCL1B   | 4. Others |
| <i>PTH</i>      | 4. Others | TCP11   | 4. Others |
| <i>PTH2</i>     | 4. Others | TDRG1   | 4. Others |
| <i>PTPN20A</i>  | 4. Others | TERC    | 4. Others |
| <i>PWRN2</i>    | 4. Others | TEX13A  | 4. Others |
| <i>RAB3C</i>    | 4. Others | TEX19   | 4. Others |
| <i>RAB3IP</i>   | 4. Others | TFDP1   | 4. Others |
| <i>RAP1B</i>    | 4. Others | TGM4    | 4. Others |
| <i>RASGEF1C</i> | 4. Others | TKTL1   | 4. Others |
| <i>RBM46</i>    | 4. Others | TLX1    | 4. Others |
| <i>RBMY1B</i>   | 4. Others | TLX2    | 4. Others |
| <i>RBMY1F</i>   | 4. Others | TNFAIP1 | 4. Others |

|                 |           |         |           |
|-----------------|-----------|---------|-----------|
| <i>RDH12</i>    | 4. Others | TNR     | 4. Others |
| <i>REG4</i>     | 4. Others | TPH1    | 4. Others |
| <i>RESP18</i>   | 4. Others | TRH     | 4. Others |
| <i>RHOXF1</i>   | 4. Others | TRIM37  | 4. Others |
| <i>RIMKLB</i>   | 4. Others | TRIM67  | 4. Others |
| <i>RNASE7</i>   | 4. Others | TRIM77  | 4. Others |
| <i>RNASE9</i>   | 4. Others | TRIML2  | 4. Others |
| <i>RPL5</i>     | 4. Others | TRPC4AP | 4. Others |
| <i>RPS3A</i>    | 4. Others | TSPY2   | 4. Others |
| <i>RUNDC3A</i>  | 4. Others | TTC29   | 4. Others |
| <i>SBSN</i>     | 4. Others | TTC4    | 4. Others |
| <i>SCARNA1</i>  | 4. Others | TUBA3C  | 4. Others |
| <i>SCARNA11</i> | 4. Others | TUBB4   | 4. Others |
| <i>SCARNA15</i> | 4. Others | TUBD1   | 4. Others |
| <i>SCARNA18</i> | 4. Others | UBE2V1  | 4. Others |
| <i>SCARNA20</i> | 4. Others | UBE2Z   | 4. Others |
| <i>SCARNA21</i> | 4. Others | UNC13A  | 4. Others |
| <i>SCARNA22</i> | 4. Others | UNC80   | 4. Others |
| <i>SCARNA3</i>  | 4. Others | UNCX    | 4. Others |
| <i>SCARNA4</i>  | 4. Others | UROC1   | 4. Others |
| <i>SCG2</i>     | 4. Others | USH1C   | 4. Others |
| <i>SCG3</i>     | 4. Others | USP1    | 4. Others |
| <i>SERPINA4</i> | 4. Others | USP32   | 4. Others |
| <i>SERPINA7</i> | 4. Others | USP35   | 4. Others |
| <i>SERPINC1</i> | 4. Others | UTP18   | 4. Others |
| <i>SMCP</i>     | 4. Others | UTS2    | 4. Others |
| <i>SMEK3P</i>   | 4. Others | UVRAG   | 4. Others |
| <i>SNAP29</i>   | 4. Others | VCX3A   | 4. Others |
| <i>SNAR-B2</i>  | 4. Others | VCY     | 4. Others |
| <i>SNAR-G1</i>  | 4. Others | VIL1    | 4. Others |
| <i>SNCB</i>     | 4. Others | VNN3    | 4. Others |
| <i>SNTG2</i>    | 4. Others | VTN     | 4. Others |
| <i>SNX31</i>    | 4. Others | WARS    | 4. Others |
| <i>SPANXA2</i>  | 4. Others | WBP11   | 4. Others |
| <i>SPANXE</i>   | 4. Others | WDR16   | 4. Others |
| <i>SPANXN1</i>  | 4. Others | WDR38   | 4. Others |
| <i>SPANXN3</i>  | 4. Others | WDR49   | 4. Others |
| <i>SPANXN4</i>  | 4. Others | WDR87   | 4. Others |
| <i>SPANXN5</i>  | 4. Others | WFDC10B | 4. Others |
| <i>SPATA16</i>  | 4. Others | WFDC11  | 4. Others |



|                 |           |              |           |
|-----------------|-----------|--------------|-----------|
| <i>SPINK8</i>   | 4. Others | WHSC1L1      | 4. Others |
| <i>SPINT4</i>   | 4. Others | WIPF2        | 4. Others |
| <i>SPO11</i>    | 4. Others | WNT16        | 4. Others |
| <i>SPP2</i>     | 4. Others | WNT7A        | 4. Others |
| <i>SPRR1A</i>   | 4. Others | WWP2         | 4. Others |
| <i>SPRR2A</i>   | 4. Others | YARS2        | 4. Others |
| <i>SPRR3</i>    | 4. Others | YEATS4       | 4. Others |
| <i>SPZ1</i>     | 4. Others | YTHDF1       | 4. Others |
| <i>SRRM4</i>    | 4. Others | ZBBX         | 4. Others |
| <i>SSX3</i>     | 4. Others | ZBTB8B       | 4. Others |
| <i>ST18</i>     | 4. Others | ZFAT         | 4. Others |
| <i>STAC2</i>    | 4. Others | ZFR2         | 4. Others |
| <i>SULT1C3</i>  | 4. Others | ZNF384       | 4. Others |
| <i>SULT6B1</i>  | 4. Others | ZNF613       | 4. Others |
| <i>T</i>        | 4. Others | ZNF689       | 4. Others |
| <i>TAC4</i>     | 4. Others | ZNF705A      | 4. Others |
| <i>TAF7L</i>    | 4. Others | ZNF735       | 4. Others |
| <i>TAGLN3</i>   | 4. Others | ZNHIT6       | 4. Others |
| <i>TBC1D28</i>  | 4. Others | C8orf56      | 5. ncRNA  |
| <i>TBPL2</i>    | 4. Others | HAR1A        | 5. ncRNA  |
| <i>TCERG1L</i>  | 4. Others | LOC100132354 | 5. ncRNA  |
| <i>TDRD1</i>    | 4. Others | LOC152225    | 5. ncRNA  |
| <i>TDRD12</i>   | 4. Others | AACSL        | 5. pseudo |
| <i>TEX13A</i>   | 4. Others | BCL8         | 5. pseudo |
| <i>TEX15</i>    | 4. Others | C3P1         | 5. pseudo |
| <i>TEX19</i>    | 4. Others | CCDC144C     | 5. pseudo |
| <i>TGIF2LX</i>  | 4. Others | CTSL3        | 5. pseudo |
| <i>TH</i>       | 4. Others | CXADRP2      | 5. pseudo |
| <i>THEG</i>     | 4. Others | DEFB109P1    | 5. pseudo |
| <i>TMEM84</i>   | 4. Others | FKSG73       | 5. pseudo |
| <i>TNP2</i>     | 4. Others | FTLP10       | 5. pseudo |
| <i>TPRX1</i>    | 4. Others | HILS1        | 5. pseudo |
| <i>TPRXL</i>    | 4. Others | HYALP1       | 5. pseudo |
| <i>TRAPPC6B</i> | 4. Others | INGX         | 5. pseudo |
| <i>TREH</i>     | 4. Others | INTS4L2      | 5. pseudo |
| <i>TRIM42</i>   | 4. Others | LOC100129055 | 5. pseudo |
| <i>TRIM60</i>   | 4. Others | LOC100129935 | 5. pseudo |
| <i>TRIM64</i>   | 4. Others | LOC100132831 | 5. pseudo |
| <i>TRIM72</i>   | 4. Others | LOC100240726 | 5. pseudo |
| <i>TRIM77</i>   | 4. Others | LOC146481    | 5. pseudo |

|                  |           |             |           |
|------------------|-----------|-------------|-----------|
| <i>TRY6</i>      | 4. Others | LOC643719   | 5. pseudo |
| <i>TSPY1</i>     | 4. Others | LOC643955   | 5. pseudo |
| <i>TSPY3</i>     | 4. Others | LOC653566   | 5. pseudo |
| <i>TSPY4</i>     | 4. Others | LOC728410   | 5. pseudo |
| <i>TTC9B</i>     | 4. Others | LOC729668   | 5. pseudo |
| <i>TTY1B</i>     | 4. Others | NF1P1       | 5. pseudo |
| <i>TTY6B</i>     | 4. Others | OR52A4      | 5. pseudo |
| <i>TTY7</i>      | 4. Others | PLGLA       | 5. pseudo |
| <i>TXNDC2</i>    | 4. Others | RNF126P1    | 5. pseudo |
| <i>UNC13A</i>    | 4. Others | SDC4P       | 5. pseudo |
| <i>UNC80</i>     | 4. Others | SLC22A20    | 5. pseudo |
| <i>UTS2</i>      | 4. Others | SLC6A10P    | 5. pseudo |
| <i>VCX3A</i>     | 4. Others | TPTE2P3     | 5. pseudo |
| <i>VDAC3</i>     | 4. Others | TRIM53      | 5. pseudo |
| <i>VPS18</i>     | 4. Others | UOX         | 5. pseudo |
| <i>VWA5B1</i>    | 4. Others | SNORA11B    | 6. ncRNA  |
| <i>VWA5B2</i>    | 4. Others | SNORA28     | 6. ncRNA  |
| <i>WDR87</i>     | 4. Others | SNORA51     | 6. ncRNA  |
| <i>WHSC1L1</i>   | 4. Others | SNORA53     | 6. ncRNA  |
| <i>WNT16</i>     | 4. Others | SNORA57     | 6. ncRNA  |
| <i>XAGE5</i>     | 4. Others | SNORA69     | 6. ncRNA  |
| <i>YEATS4</i>    | 4. Others | SNORD115-13 | 6. ncRNA  |
| <i>ZCCHC13</i>   | 4. Others | SNORD115-7  | 6. ncRNA  |
| <i>ZFAT</i>      | 4. Others | SNORD17     | 6. ncRNA  |
| <i>ZFP42</i>     | 4. Others | ABCC13      | 6. pseudo |
| <i>ZIC5</i>      | 4. Others | LOC728024   | 6. pseudo |
| <i>ZKSCAN5</i>   | 4. Others |             |           |
| <i>ZMAT4</i>     | 4. Others |             |           |
| <i>ZNF330</i>    | 4. Others |             |           |
| <i>ZNF350</i>    | 4. Others |             |           |
| <i>ZNF410</i>    | 4. Others |             |           |
| <i>ZNF534</i>    | 4. Others |             |           |
| <i>ZNF57</i>     | 4. Others |             |           |
| <i>ZNF679</i>    | 4. Others |             |           |
| <i>ZNF705D</i>   | 4. Others |             |           |
| <i>ZNF710</i>    | 4. Others |             |           |
| <i>ZNF735</i>    | 4. Others |             |           |
| <i>C8orf56</i>   | 5. ncRNA  |             |           |
| <i>LOC285548</i> | 5. ncRNA  |             |           |
| <i>LOC728606</i> | 5. ncRNA  |             |           |

|                      |           |
|----------------------|-----------|
| <i>LOC731789</i>     | 5. ncRNA  |
| <i>PART1</i>         | 5. ncRNA  |
| <i>AACSL</i>         | 5. pseudo |
| <i>ADAM3A</i>        | 5. pseudo |
| <i>ADAM5P</i>        | 5. pseudo |
| <i>C3orf50</i>       | 5. pseudo |
| <i>CLCA3P</i>        | 5. pseudo |
| <i>CSNK1A1P</i>      | 5. pseudo |
| <i>CSPG4PY2</i>      | 5. pseudo |
| <i>CSTT</i>          | 5. pseudo |
| <i>CTSL3</i>         | 5. pseudo |
| <i>DKFZp686A1627</i> | 5. pseudo |
| <i>FLJ40434</i>      | 5. pseudo |
| <i>FTLP10</i>        | 5. pseudo |
| <i>GOLGA8C</i>       | 5. pseudo |
| <i>HBBP1</i>         | 5. pseudo |
| <i>HSFYL1</i>        | 5. pseudo |
| <i>HYALP1</i>        | 5. pseudo |
| <i>LOC100240726</i>  | 5. pseudo |
| <i>LOC146481</i>     | 5. pseudo |
| <i>LOC347376</i>     | 5. pseudo |
| <i>LOC348840</i>     | 5. pseudo |
| <i>LOC650293</i>     | 5. pseudo |
| <i>LOC653544</i>     | 5. pseudo |
| <i>LOC729176</i>     | 5. pseudo |
| <i>LOC729668</i>     | 5. pseudo |
| <i>NF1P1</i>         | 5. pseudo |
| <i>OR3A4</i>         | 5. pseudo |
| <i>OR52A4</i>        | 5. pseudo |
| <i>OR6W1P</i>        | 5. pseudo |
| <i>PER4</i>          | 5. pseudo |
| <i>PSG10</i>         | 5. pseudo |
| <i>RBMY1A3P</i>      | 5. pseudo |
| <i>RBMY2EP</i>       | 5. pseudo |
| <i>REG1P</i>         | 5. pseudo |
| <i>REXO1L1</i>       | 5. pseudo |
| <i>SERPINA13</i>     | 5. pseudo |
| <i>SKINTL</i>        | 5. pseudo |
| <i>TDGF3</i>         | 5. pseudo |
| <i>TMPRSS11BNL</i>   | 5. pseudo |

|                  |           |
|------------------|-----------|
| <i>UBE2DNL</i>   | 5. pseudo |
| <i>UOX</i>       | 5. pseudo |
| <i>USP17L6P</i>  | 5. pseudo |
| <i>VENTXP1</i>   | 5. pseudo |
| <i>VENTXP7</i>   | 5. pseudo |
| <i>ZNF271</i>    | 5. pseudo |
| <i>SNORA11</i>   | 6. ncRNA  |
| <i>SNORA11D</i>  | 6. ncRNA  |
| <i>SNORA11E</i>  | 6. ncRNA  |
| <i>SNORA13</i>   | 6. ncRNA  |
| <i>SNORA28</i>   | 6. ncRNA  |
| <i>SNORA2B</i>   | 6. ncRNA  |
| <i>SNORA32</i>   | 6. ncRNA  |
| <i>SNORA38</i>   | 6. ncRNA  |
| <i>SNORA38B</i>  | 6. ncRNA  |
| <i>SNORA42</i>   | 6. ncRNA  |
| <i>SNORA44</i>   | 6. ncRNA  |
| <i>SNORA58</i>   | 6. ncRNA  |
| <i>SNORA5B</i>   | 6. ncRNA  |
| <i>SNORA66</i>   | 6. ncRNA  |
| <i>SNORA71C</i>  | 6. ncRNA  |
| <i>SNORA71D</i>  | 6. ncRNA  |
| <i>SNORA78</i>   | 6. ncRNA  |
| <i>SNORA79</i>   | 6. ncRNA  |
| <i>SNORA80</i>   | 6. ncRNA  |
| <i>SNORD89</i>   | 6. ncRNA  |
| <i>LILRP2</i>    | 6. pseudo |
| <i>LOC441601</i> | 6. pseudo |

---
