# Supplementary material for: TM4SF4 and LRRK2 Are Potential Therapeutic Targets in Lung and Breast Cancers through Outlier Analysis
Source: PubMed Central journal article supplement — Cancer Res Treat. 2020 Sep 16;53(1):9–24. doi: 10.4143/crt.2020.434 (PMC7812009; doi:10.4143/crt.2020.434), 2020-09-16
Supplement: crt-2020-434_S7Fig.pdf [file crt-2020-434_S7Fig.pdf]

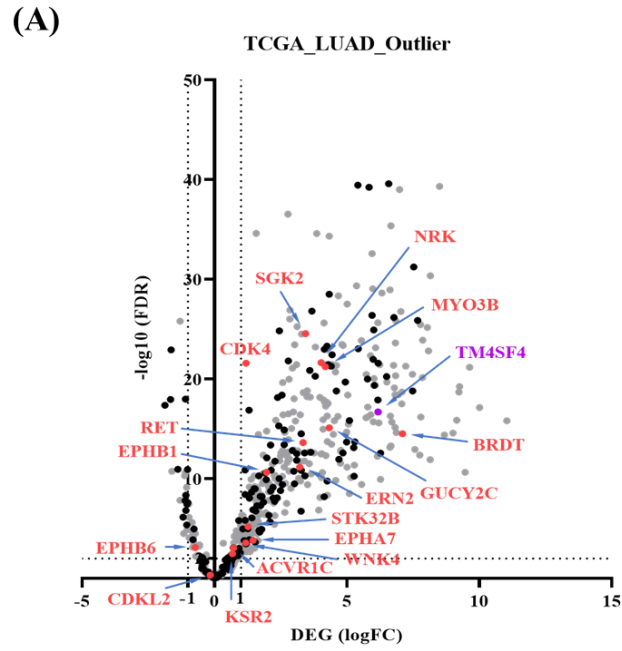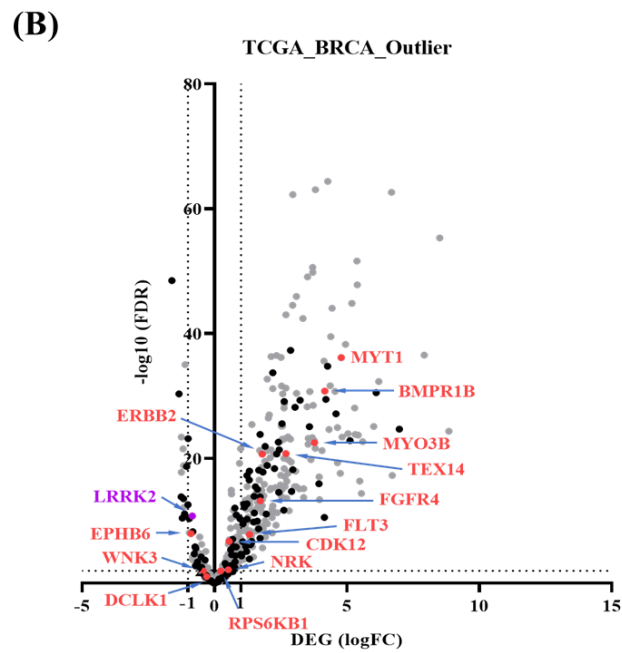

**S7 Fig.** A volcano plot of false discovery rate ( $-\log_{10}$  FDR) against fold change (logFC) of outlier genes. Red, black, and gray circles indicate the kinase group, membrane group, and others, respectively. These datasets were downloaded from The Cancer Genome Atlas (TCGA).
