# Supplementary material for: TM4SF4 and LRRK2 Are Potential Therapeutic Targets in Lung and Breast Cancers through Outlier Analysis
Source: PubMed Central journal article supplement — Cancer Res Treat. 2020 Sep 16;53(1):9–24. doi: 10.4143/crt.2020.434 (PMC7812009; doi:10.4143/crt.2020.434), 2020-09-16
Supplement: crt-2020-434_S8Table.pdf [file crt-2020-434_S8Table.pdf]

**S8 Table.** Outlier gene list in 140 formalin-fixed paraffin-embedded lung adenocarcinoma (LUAD) samples

| Gene            | Outlier types                  | OL $\geq$ 7,<br>mZ $\geq$ 10<br>No. | OL $\geq$ 7,<br>mZ $\geq$ 10<br>Frequency | Outlier from open database<br>(LUAD) |
|-----------------|--------------------------------|-------------------------------------|-------------------------------------------|--------------------------------------|
| <i>TM4SF4</i>   | 3. Predicted membrane proteins | 18                                  | 0.13                                      | 3. Predicted membrane proteins       |
| <i>MUC13</i>    | 3. Predicted membrane proteins | 17                                  | 0.12                                      | 3. Predicted membrane proteins       |
| <i>DLK1</i>     | 3. Predicted membrane proteins | 9                                   | 0.06                                      |                                      |
| <i>USH1C</i>    | 4. Other                       | 9                                   | 0.06                                      | 4. Other                             |
| <i>SOX11</i>    | 4. Other                       | 8                                   | 0.06                                      | 4. Other                             |
| <i>VIL1</i>     | 4. Other                       | 8                                   | 0.06                                      | 4. Other                             |
| <i>FGA</i>      | 4. Other                       | 7                                   | 0.05                                      | 4. Other                             |
| <i>PAEP</i>     | 4. Other                       | 7                                   | 0.05                                      | 4. Other                             |
| <i>APOBEC1</i>  | 4. Other                       | 6                                   | 0.04                                      | 4. Other                             |
| <i>FGB</i>      | 4. Other                       | 6                                   | 0.04                                      | 4. Other                             |
| <i>FGL1</i>     | 4. Other                       | 6                                   | 0.04                                      | 4. Other                             |
| <i>LBP</i>      | 4. Other                       | 6                                   | 0.04                                      |                                      |
| <i>SERPINA5</i> | 4. Other                       | 6                                   | 0.04                                      | 4. Other                             |
| <i>RNF186</i>   | 3. Predicted membrane proteins | 4                                   | 0.03                                      | 3. Predicted membrane proteins       |
| <i>ABP1</i>     | 4. Other                       | 4                                   | 0.03                                      |                                      |
| <i>TRIM15</i>   | 4. Other                       | 4                                   | 0.03                                      | 4. Other                             |
| <i>TRIM31</i>   | 4. Other                       | 4                                   | 0.03                                      | 4. Other                             |
| <i>KCNH2</i>    | 3. Predicted membrane proteins | 3                                   | 0.02                                      | 3. Predicted membrane proteins       |
| <i>AGT</i>      | 4. Other                       | 3                                   | 0.02                                      | 4. Other                             |
| <i>CGA</i>      | 4. Other                       | 3                                   | 0.02                                      | 4. Other                             |
| <i>NOLA</i>     | 4. Other                       | 3                                   | 0.02                                      |                                      |
| <i>PPP1R14D</i> | 4. Other                       | 3                                   | 0.02                                      |                                      |
| <i>RUNDC3A</i>  | 4. Other                       | 3                                   | 0.02                                      | 4. Other                             |
| <i>CDH18</i>    | 3. Predicted membrane proteins | 2                                   | 0.01                                      |                                      |
| <i>GABRA5</i>   | 3. Predicted membrane proteins | 2                                   | 0.01                                      |                                      |
| <i>ASCL1</i>    | 4. Other                       | 2                                   | 0.01                                      |                                      |
| <i>AZGP1</i>    | 4. Other                       | 2                                   | 0.01                                      | 4. Other                             |
| <i>CALCA</i>    | 4. Other                       | 2                                   | 0.01                                      | 4. Other                             |
| <i>DDC</i>      | 4. Other                       | 2                                   | 0.01                                      | 4. Other                             |
| <i>FGF3</i>     | 4. Other                       | 2                                   | 0.01                                      |                                      |
| <i>IGFBP1</i>   | 4. Other                       | 2                                   | 0.01                                      | 4. Other                             |
| <i>KIF5C</i>    | 4. Other                       | 2                                   | 0.01                                      | 4. Other                             |
| <i>NEFH</i>     | 4. Other                       | 2                                   | 0.01                                      | 4. Other                             |
| <i>PAH</i>      | 4. Other                       | 2                                   | 0.01                                      | 4. Other                             |
| <i>PCK1</i>     | 4. Other                       | 2                                   | 0.01                                      |                                      |
| <i>PROX1</i>    | 4. Other                       | 2                                   | 0.01                                      | 4. Other                             |
| <i>ZMAT4</i>    | 4. Other                       | 2                                   | 0.01                                      | 4. Other                             |
