# Supplementary material for: TM4SF4 and LRRK2 Are Potential Therapeutic Targets in Lung and Breast Cancers through Outlier Analysis
Source: PubMed Central journal article supplement — Cancer Res Treat. 2020 Sep 16;53(1):9–24. doi: 10.4143/crt.2020.434 (PMC7812009; doi:10.4143/crt.2020.434), 2020-09-16
Supplement: crt-2020-434_S10Fig.pdf [file crt-2020-434_S10Fig.pdf]

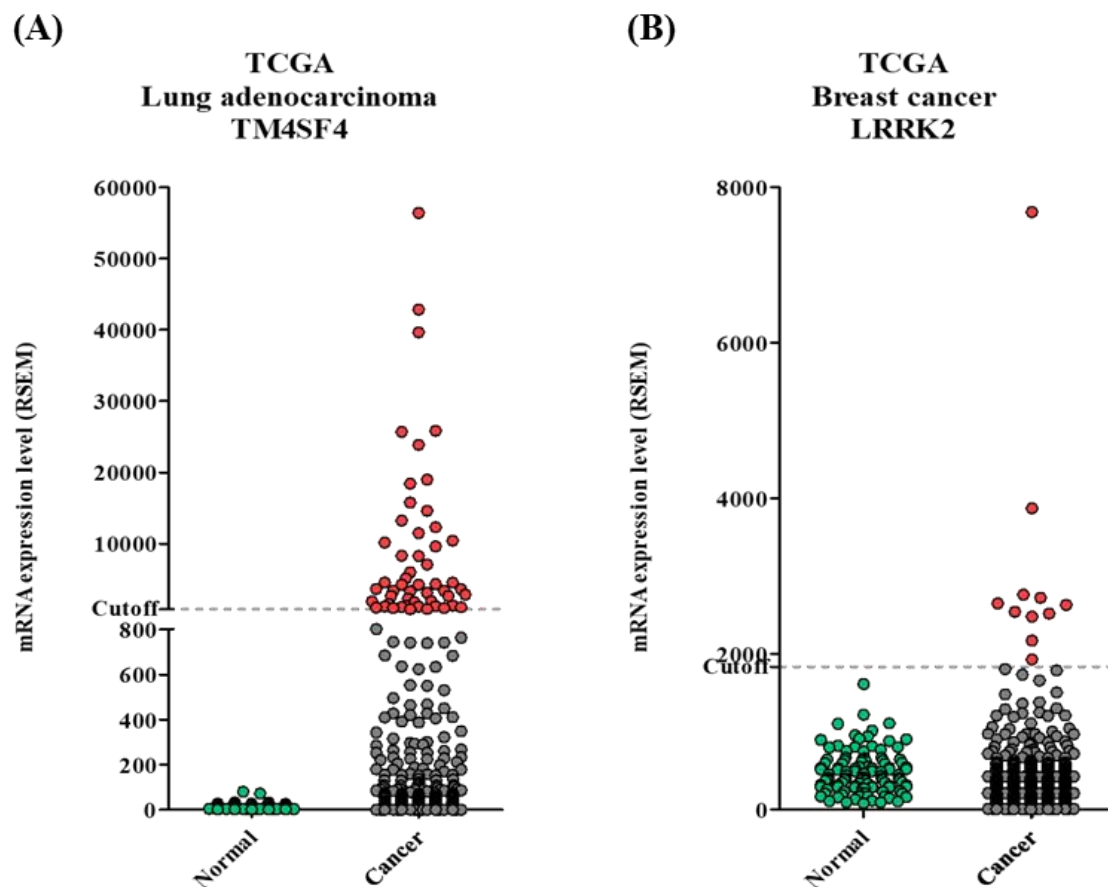

**S10 Fig.** Scatter plot display TM4SF4 (A) and LRRK2 (B) expression profiles. Red and gray circles indicate the outlier and others, respectively. These datasets were downloaded from The Cancer Genome Atlas (TCGA).
