# Supplementary material for: TM4SF4 and LRRK2 Are Potential Therapeutic Targets in Lung and Breast Cancers through Outlier Analysis
Source: PubMed Central journal article supplement — Cancer Res Treat. 2020 Sep 16;53(1):9–24. doi: 10.4143/crt.2020.434 (PMC7812009; doi:10.4143/crt.2020.434), 2020-09-16
Supplement: crt-2020-434_S12Table.pdf [file crt-2020-434_S12Table.pdf]

**S12 Table.** Clinicopathological characteristics of the lung adenocarcinoma patients

|                           | Total<br>(n=119) | TM4SF4 IHC       |                   | p-value |
|---------------------------|------------------|------------------|-------------------|---------|
|                           |                  | Outlier<br>(n=5) | Others<br>(n=114) |         |
| <b>Sex</b>                |                  |                  |                   |         |
| Male                      | 69               | 2                | 67                | 0.649   |
| Female                    | 50               | 3                | 47                |         |
| <b>Age (yr)</b>           |                  |                  |                   |         |
| Median (range)            |                  | 66 (30-70)       | 59.5 (20-78)      |         |
| ≥ 65                      | 26               | 3                | 23                | 0.069   |
| < 65                      | 93               | 2                | 91                |         |
| <b>Smoking</b>            |                  |                  |                   |         |
| Yes                       | 57               | 1                | 56                | 0.367   |
| No                        | 62               | 4                | 58                |         |
| <b>Differentiation</b>    |                  |                  |                   |         |
| Well differentiated       | 26               | 1                | 25                | 0.158   |
| Moderately differentiated | 50               | 4                | 46                |         |
| Poorly differentiated     | 43               | 0                | 43                |         |
| <b>Stage</b>              |                  |                  |                   |         |
| I, II                     | 87               | 4                | 83                | 1.0     |
| III, IV                   | 32               | 1                | 31                |         |
| <b>Recurrence</b>         |                  |                  |                   |         |
| Yes                       | 66               | 1                | 65                | 0.171   |
| No                        | 53               | 4                | 49                |         |
