# Supplementary material for: TM4SF4 and LRRK2 Are Potential Therapeutic Targets in Lung and Breast Cancers through Outlier Analysis
Source: PubMed Central journal article supplement — Cancer Res Treat. 2020 Sep 16;53(1):9–24. doi: 10.4143/crt.2020.434 (PMC7812009; doi:10.4143/crt.2020.434), 2020-09-16
Supplement: crt-2020-434_S13Fig.pdf [file crt-2020-434_S13Fig.pdf]

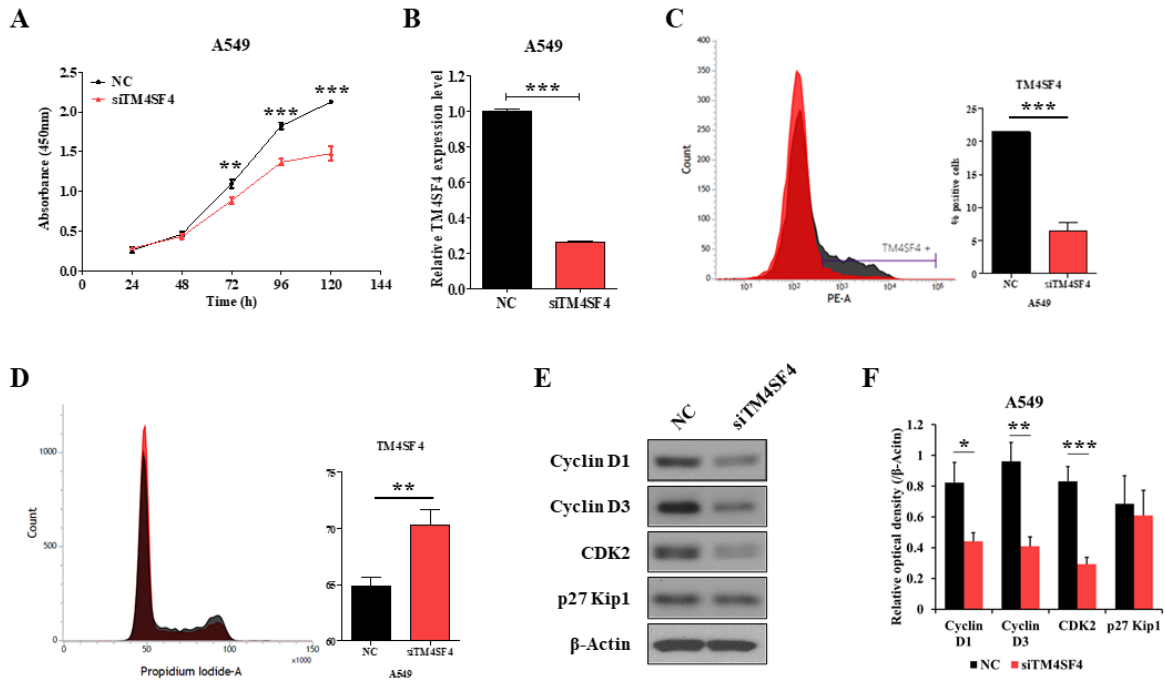

**S13 Fig.** *TM4SF4* knockdown in lung adenocarcinoma cell lines reduces cell growth. A549 cells were treated with siTM4SF4. (A) Growth curve shows the effect of targeting *TM4SF4* in A549 cells. (B, C) *TM4SF4* knockdown was confirmed by quantitative reverse transcription–polymerase chain reaction and fluorescence-activated cell sorting analysis. (D, E) A549 cells transfected with siTM4SF4 showed an increase in the G1 population and a decrease in G1/S checkpoint protein levels. (F) Data quantification of panel (E).
