# Supplementary material for: TM4SF4 and LRRK2 Are Potential Therapeutic Targets in Lung and Breast Cancers through Outlier Analysis
Source: PubMed Central journal article supplement — Cancer Res Treat. 2020 Sep 16;53(1):9–24. doi: 10.4143/crt.2020.434 (PMC7812009; doi:10.4143/crt.2020.434), 2020-09-16
Supplement: crt-2020-434_S14Table.pdf [file crt-2020-434_S14Table.pdf]

**S14 Table.** Kinase outlier gene drug lists

| Gene           | Potent and selective drugs                    |
|----------------|-----------------------------------------------|
| <i>BMPR1B</i>  | -                                             |
| <i>CDK12</i>   | SR-4835, THZ531                               |
| <i>DCLK1</i>   | -                                             |
| <i>EPHB6</i>   | -                                             |
| <i>ERBB2</i>   | Trastuzumab, Lapatinib, Tucatinib, Mubritinib |
| <i>FGFR4</i>   | Fisogatinib                                   |
| <i>FLT3</i>    | Sorafenib, SKLB4771                           |
| <i>LRRK2</i>   | LRRK2-IN-1, HG-10-102-01                      |
| <i>MYO3B</i>   | -                                             |
| <i>MYT1</i>    | -                                             |
| <i>NRK</i>     | -                                             |
| <i>RPS6KB1</i> | SL 0101-1                                     |
| <i>TEX14</i>   | -                                             |
| <i>WNK3</i>    | WNK463                                        |
| <i>BRDT</i>    | -                                             |
